# Supplementary material for: Novel Tri-Segmented Rhabdoviruses: A Data Mining Expedition Unveils the Cryptic Diversity of Cytorhabdoviruses
Source: MDPI journal article supplement (doi:10.3390/v15122402), 2023-12-10
Supplement: s1 [file s1]

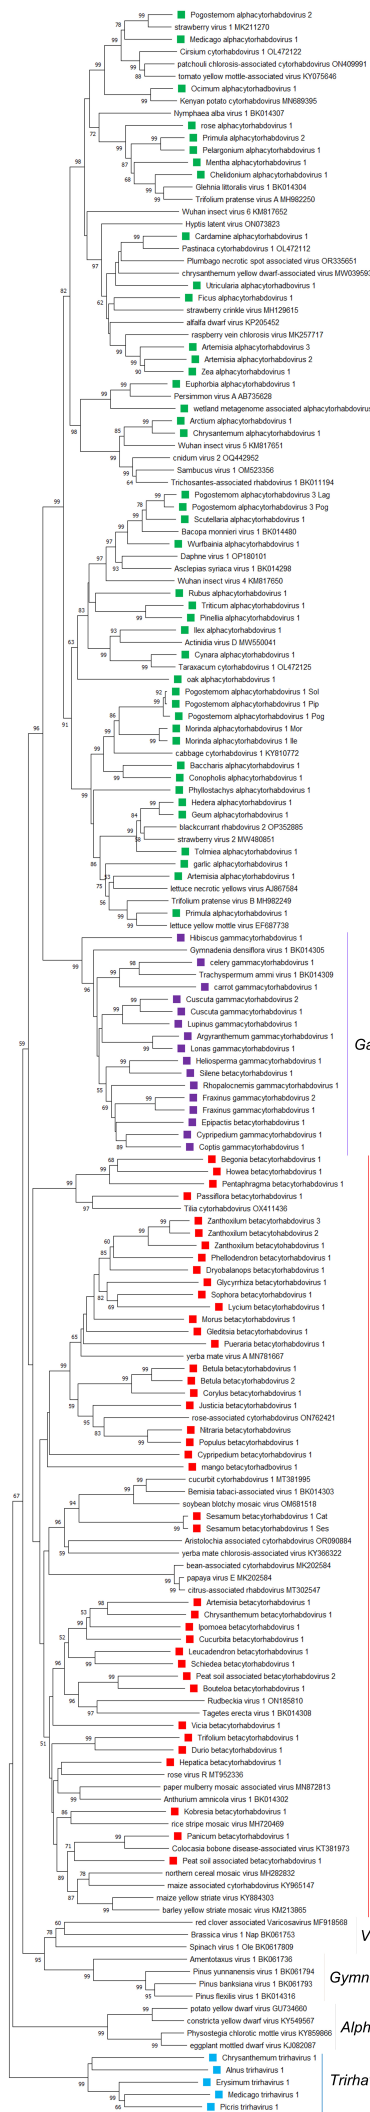

### Alphacytoviridae

### Gammacytoviridae

### Betacytoviridae

### Varicosaviridae

### Gymnorhavirus

### Alphanucleorhabdovirus

### Trirhavirus
