# Supplementary material for: Novel Tri-Segmented Rhabdoviruses: A Data Mining Expedition Unveils the Cryptic Diversity of Cytorhabdoviruses
Source: MDPI journal article supplement (doi:10.3390/v15122402), 2023-12-10
Supplement: s1 [file s1]

Supplementary Table S1. Virus names and abbreviations of cytorhabdovirus sequences used in this study.

| <b>Virus name</b>                           | <b>Abbreviation</b> |
|---------------------------------------------|---------------------|
| Actinidia cytorhabdovirus                   | AcCV                |
| alfalfa dwarf virus                         | ADV                 |
| Anthurium Amnicola virus 1                  | AntAmV1             |
| Aristolochia associated cytorhabdovirus     | AriACRV             |
| Asclepias syriaca virus 1                   | AscSyV1             |
| Bacopa monnieri virus 1                     | BmV1                |
| Bemisia tabaci associated virus 1           | BeTaV1              |
| blackcurrant cytorhabdovirus 2              | BCRV2               |
| barley yellow striate mosaic virus          | BYSMV               |
| cabbage cytorhabdovirus 1                   | CCyV1               |
| chrysanthemum yellow dwarf-associated virus | ChYDaV              |
| Cirsium cytorhabdovirus 1                   | CCRV1               |
| Cnidium virus 2                             | CnV2                |
| Colocasia bobone disease-associated virus   | CBDaV               |
| cucurbit cytorhabdovirus 1                  | CuCV1               |
| Daphne virus 1                              | DV1                 |
| Glehnia littoralis virus 1                  | GLV1                |
| Gymnadenia densiflora virus 1               | GymDenV1            |
| Hyptis latent virus                         | HpLV                |
| Kenyan potato cytorhabdovirus               | KePCyV              |
| lettuce necrotic yellows virus              | LNYV                |
| lettuce yellow mottle virus                 | LYMoV               |
| maize associated cytorhabdovirus            | MaCyV               |
| maize yellow striate virus                  | MYSV                |
| northern cereal mosaic virus                | NCMV                |
| Nymphaea alba virus 1                       | NymAV1              |
| papaya virus E                              | PpVE                |
| paper mulberry mosaic-associated virus      | PMuMaV              |
| Pastinaca cytorhabdovirus 1                 | PaCRV1              |
| pachouly chlorosis associated virus         | PCaCV               |
| persimmon virus A                           | PeVA                |
| Physostegia chlorotic mottle virus          | PhCMoV              |
| Plumbago necrotic spot associated virus     | PNSaV               |
| potato yellow dwarf virus                   | PYDV                |
| raspberry vein chlorosis virus              | RVCV                |
| rice stripe mosaic virus                    | RSMV                |
| rose associated cytorhabdovirus             | RaCV                |
| rose virus R                                | RVR                 |
| Rudbeckia virus 1                           | RudV1               |
| Sambucus virus 1                            | SaV1                |
| strawberry crinkle virus                    | SCV                 |
| strawberry virus 1                          | StrV1               |
| strawberry virus 2                          | StrV2               |
| soybean blotchy mosaic virus                | SbBMV               |
| Tagetes erecta virus 1                      | TaEV1               |
| Taraxacum cytorhabdovirus                   | TCRV1               |
| Tillia cytorhabdovirus 1                    | TiCRV1              |
| tomato yellow mottle associated virus       | TYMaV               |
| Trachyspermum ammi virus 1                  | TrAV1               |
| Trichosanthes-associated rhabdovirus 1      | TrARV1              |
| Trifolium pratense virus A                  | TpVA                |
| Trifolium pratense virus B                  | TpVB                |

|                                       |       |
|---------------------------------------|-------|
| Wuhan insect virus 4                  | WhIV4 |
| Wuhan insect virus 5                  | WhIV5 |
| Wuhan insect virus 6                  | WhIV6 |
| yerba mate chlorosis-associated virus | YmCaV |
| yerba mate virus A                    | YmVA  |
