# Supplementary material for: Novel Tri-Segmented Rhabdoviruses: A Data Mining Expedition Unveils the Cryptic Diversity of Cytorhabdoviruses
Source: MDPI journal article supplement (doi:10.3390/v15122402), 2023-12-10
Supplement: s1 [file s1]

**Table 3.** Summary of novel gammacytorhabdoviruses identified from plant RNA-seq data available on NCBI.

| Plant host                                                 | Taxa/<br>family              | Virus name/<br>Abbreviation                          | Bioproject ID/<br>Data citation                               | Length<br>(nt) | Accession<br>number | Protein ID             | Length<br>(aa)                   | Highest scoring virus-<br>protein/ <i>E</i> -value/query<br>coverage%/identity% (Blast<br>P)                                            |
|------------------------------------------------------------|------------------------------|------------------------------------------------------|---------------------------------------------------------------|----------------|---------------------|------------------------|----------------------------------|-----------------------------------------------------------------------------------------------------------------------------------------|
| Teide marguerite<br>( <i>Argyranthemum<br/>tenerifae</i> ) | Dicot/ <i>Asteraceae</i>     | Argyranthemum<br>gammacytorhabdovirus 1/<br>ArgGCRV1 | PRJNA491458/<br>[92]                                          | 10801          | BK064345            | N<br>P<br>P3<br>M<br>L | 450<br>297<br>231<br>176<br>2068 | GymDenV1-N/1e-98/94/41.31<br>no hits<br>TrAV1-P3/7e-28/96/29.91<br>GymDenV1-M/1e-24/88/33.97<br>GymDenV1-L/0.0/99/55.15                 |
| carrot ( <i>Daucus carota</i> )                            | Dicot/ <i>Apiaceae</i>       | Daucus<br>gammacytorhabdovirus 1/<br>DauGCRV1        | PRJNA745346/<br>Chakrabarti, S.,<br>CSIR-IICB,<br>unpublished | 11730          | BK064346            | N<br>P<br>P3<br>M<br>L | 459<br>328<br>230<br>201<br>2069 | TrAV1-N/2e-133/95/47.42<br>TrAV1-P/2e-36/99/30.65<br>TrAV1-P3/4e-52/95/39.73<br>GymDenV1-M/2e-23/91/33.33<br>TrAV1-L/0.0/99/64.34       |
| celery ( <i>Apium<br/>graveolens</i> )                     | Dicot/ <i>Apiaceae</i>       | Apium<br>gammacytorhabdovirus1/<br>ApiGCRV1          | PRJNA543957/<br>[97]                                          | 12008          | BK064347            | N<br>P<br>P3<br>M<br>L | 455<br>325<br>233<br>197<br>2069 | TrAV1-N/4e-173/94/57.83<br>TrAV1-P/2e-81/87/47.44<br>TrAV1-P3/4e-81/94/53.95<br>TrAV1-M/4e-61/94/51.87<br>TrAV1-L/0.0/100/72.5          |
| Chinese goldthread<br>( <i>Coptis chinensis</i> )          | Dicot/ <i>Ranunculaceae</i>  | Coptis<br>gammacytorhabdovirus 1/<br>CopGCRV1        | PRJNA361017/<br>[98]                                          | 11214          | BK064348            | N<br>P<br>P3<br>M<br>L | 437<br>286<br>227<br>187<br>2069 | GynDenV1-N/5e-118/99/42.6<br>TrAV1-P/2e-30/97/28.52<br>TrAV1-P3/1e-47/93/35.81<br>GymDenV1-M/2e-40/93/41.95<br>TrAV1-L/0.0/99/61.74     |
| Bigseed alfalfa dodder<br>( <i>Cuscuta indecora</i> )      | Dicot/ <i>Convolvulaceae</i> | Cuscuta<br>gammacytorhabdovirus 1/<br>CusGCRV1       | PRJNA543296/<br>[99]                                          | 10772          | BK064349            | N<br>P<br>P3<br>M<br>L | 429<br>301<br>220<br>196<br>2054 | TrAV1-N/7e-108/96/43.68<br>GymDenV1-P/3e-21/92/29.87<br>TrAV1-P3/3e-16/97/25.23<br>GymDenV1-M/6e-13/80/32.1<br>GymDenV1-L/0.0/99/50.17  |
| Nevada dodder<br>( <i>Cuscuta nevadensis</i> )             | Dicot/ <i>Convolvulaceae</i> | Cuscuta<br>gammacytorhabdovirus 2/<br>CusGCRV2       | PRJNA561399/<br>Frangione, E.,<br>Canada,<br>unpublished      | 10700          | BK064350            | N<br>P<br>P3<br>M<br>L | 429<br>302<br>220<br>188<br>2054 | TrAV1-N/1e-106/96/42.49<br>GymDenV1-P/9e-20/83/27.97<br>TrAV1-P3/2e-17/95/27.78<br>GymDenV1-M/6e-17/85/34.15<br>GymDenV1-L/0.0/99/50.85 |

|                                                      |                               |                                                    |                       |       |          |                              |                                        |                                                                                                                                                 |
|------------------------------------------------------|-------------------------------|----------------------------------------------------|-----------------------|-------|----------|------------------------------|----------------------------------------|-------------------------------------------------------------------------------------------------------------------------------------------------|
| Slipper orchid<br>( <i>Cypripedium flavum</i> )      | Monocot/ <i>Orchidaceae</i>   | Cypripedium<br>gammacytorhabdovirus 1/<br>CypGCRV1 | PRJNA479379/<br>[73]  | 10872 | BK064351 | N<br>P<br>P3<br>M<br>L       | 437<br>283<br>228<br>213<br>2069       | GymDenV1-N/2e-117/96/45.5<br>GymDenV1-P/2e-46/96/35.1<br>TrAV1-P3/4e-36/94/34.86<br>GymDenV1-M/4e-38/83/37.64<br>GymDenV1-L/0.0/99/60.34        |
| Violet helleborine<br>( <i>Epipactis purpurata</i> ) | Monocot/ <i>Orchidaceae</i>   | Epipactis<br>gammacytorhabdovirus 1/<br>EpiGCRV1   | PRJNA450088/<br>[100] | 11001 | BK064352 | N<br>P<br>P3<br>L            | 452<br>300<br>225<br>2064              | GymDenV1-N/2e-102/86/42.36<br>GymDenV1-P/4e-21/93/26.51<br>TrAV1-P3/2e-26/64/34.72<br>GymDenV1-L/0.0/99/57.83                                   |
| Common ash<br>( <i>Fraxinus excelsior</i> )          | Dicot/ <i>Oleaceae</i>        | Fraxinus<br>gammacytorhabdovirus 1/<br>FraGCRV1    | PRJEB4958/<br>[101]   | 11521 | BK064353 | N<br>P<br>P3<br>M<br>P5<br>L | 443<br>284<br>224<br>184<br>65<br>2068 | TrAV1-1e-96/94/41.96<br>GymDenV1-P/1e-26/94/28.81<br>TrAV1-P3/7e-29/97/29.41<br>GymDenV1-M/2e-30/85/38.22<br>no hits<br>GymDenV1-L0.0/99/55.78  |
| Ash dieback<br>( <i>Hymenoscyphus fraxineus</i> )    | -                             | Fraxinus<br>gammacytorhabdovirus 2/<br>FraGCRV2    | PRJEB7998/<br>[102]   | 11737 | BK064354 | N<br>P<br>P3<br>M<br>P5<br>L | 439<br>285<br>224<br>187<br>55<br>2068 | GymDenV1-2e-101/89/40.61<br>GymDenV1-P/8e-39/94/30.51<br>TrAV1-P3/6e-33/96/34.84<br>GymDenV1-M/7e-31/86/36.65<br>no hits<br>GymDenV1-L0.0/99/56 |
| Dwarf heliosperma<br>( <i>Heliosperma pusillum</i> ) | Dicot/ <i>Caryophyllaceae</i> | Heliosperma<br>gammacytorhabdovirus 1/<br>HelGCRV1 | PRJNA760819/<br>[103] | 11579 | BK064355 | N<br>P<br>P3<br>M<br>L       | 436<br>308<br>221<br>206<br>2063       | GymDenV1-N/3e-102/90/41.65<br>GymDenV1-P/2e-30/84/31.9<br>TrAV1-P3/1e-27/95/31.63<br>GymDenV1-M/5e-29/83/35.67<br>GymDenV1-L/0.0/99/58.31       |
| Kenaf<br>( <i>Hibiscus cannabinus</i> )              | Dicot/ <i>Malvaceae</i>       | Hibiscus<br>gammacytorhabdovirus 1/<br>HibGCRV1    | PRJNA602109/<br>[104] | 11079 | BK064356 | N<br>P<br>P3<br>M<br>L       | 458<br>391<br>221<br>194<br>2063       | GymDenV1-N/3e-77/88/35.39<br>GymDenV1-P/6e-08/62/25.99<br>TrAV1-P3/2e-16/78/26.92<br>GymDenV1-M/9e-12/79/26.45<br>TrAV1-L/0.0/99/53.86          |
| Golden ageratum<br>( <i>Lonas annua</i> )            | Dicot/ <i>Asteraceae</i>      | Lonas<br>gammacytorhabdovirus 1/<br>LonGCRV1       | PRJNA371565/<br>[105] | 11920 | BK064357 | N<br>P<br>P3<br>M<br>L       | 450<br>297<br>231<br>176<br>2068       | GymDenV1-N/5e-106/88/44.75<br>GymDenV1-P/1e-20/94/26.56<br>TrAV1-P3/3e-24/95/27.6<br>GymDenV1-M/5e-24/88/30.77<br>GymDenV1-L/0.0/99/55.40       |

|                                                           |                               |                                                      |                       |       |          |                        |                                  |                                                                                                                                            |
|-----------------------------------------------------------|-------------------------------|------------------------------------------------------|-----------------------|-------|----------|------------------------|----------------------------------|--------------------------------------------------------------------------------------------------------------------------------------------|
| Mantano river lupine<br>( <i>Lupinus mantaroensis</i> )   | Dicot/ <i>Fabaceae</i>        | Lupinus<br>gammacytorhabdovirus 1/<br>LupGCRV1       | PRJNA318864/<br>[106] | 11196 | BK064358 | N<br>P<br>P3<br>M<br>L | 430<br>314<br>221<br>189<br>2057 | TrAV1-N/8e-105/98/40.95<br>GymDenV1-P/9e-20/85/25.91<br>TrAV1-P3/1e-16/76/30.41<br>GymDenV1-M/1e-08/84/27.16<br>TrAV1-L/0.0/99/51.47       |
| Stinkhorn clubhead<br>( <i>Rhopalocnemis phalloides</i> ) | Dicot/ <i>Balanophoraceae</i> | Rhopalocnemis<br>gammacytorhabdovirus 1/<br>RhoGCRV1 | PRJNA737177/<br>[107] | 11024 | BK064359 | N<br>P<br>P3<br>L      | 469<br>305<br>231<br>2071        | GymDenV1-N/6e-110/86/43.06<br>GymDenV1-P/1e-17/84/26.16<br>TrAV1-P3/7e-25/92/29.17<br>GymDenV1-L/0.0/99/55.86                              |
| Bladder campion<br>( <i>Silene vulgaris</i> )             | Dicot/ <i>Caryophyllaceae</i> | Silene<br>gammacytorhabdovirus 1/<br>SilGCRV1        | PRJNA104951/<br>[108] | 11500 | BK064360 | N<br>P<br>P3<br>M<br>L | 435<br>311<br>221<br>209<br>2066 | GymDenV1-N/6e-107/89/43.83<br>GymDenV1-P/3e-35/88/29.14<br>TrAV1-P3/9e-33/97/31.96<br>GymDenV1-M/5e-31/80/36.09<br>GymDenV1-L/0.0/99/58.04 |

\* Acronyms of best hits are listed in Supp. Table S1.
