# Supplementary material for: Novel Tri-Segmented Rhabdoviruses: A Data Mining Expedition Unveils the Cryptic Diversity of Cytorhabdoviruses
Source: MDPI journal article supplement (doi:10.3390/v15122402), 2023-12-10
Supplement: s1 [file s1]

**Table 4.** Summary of trirhviruses identified from plant RNA-seq data available on NCBI, including the reannotation of Picris cytorhabdovirus 1 sequence.

| Plant host                                                   | Taxa/<br>family           | Virus name/<br>Abbreviation               | Bioproject ID/<br>Data citation                    | RNA segment/<br>Length (nt)                             | Accession<br>number                                  | Protein<br>ID                                           | Length<br>(aa)                                                     | Highest scoring virus-<br>protein/E-value/query<br>coverage%/identity% (Blast P)                                                                                                                                    |
|--------------------------------------------------------------|---------------------------|-------------------------------------------|----------------------------------------------------|---------------------------------------------------------|------------------------------------------------------|---------------------------------------------------------|--------------------------------------------------------------------|---------------------------------------------------------------------------------------------------------------------------------------------------------------------------------------------------------------------|
| Red alder<br>( <i>Alnus rubra</i> )                          | <i>Dicot/Betulaceae</i>   | Alnus<br>trirhavirus 1/<br>AITRV1         | PRJNA691057/<br>Bell, C., NCGR,<br>USA,unpublished | RNA1 6699<br>RNA2 5289<br><br><br><br><br><br>RNA3 4586 | BK064247<br>BK064248<br><br><br><br><br><br>BK064249 | L<br>N<br>P2<br>P3<br>P4<br>P5<br>P6<br>P7<br>P8<br>P11 | 2043<br>442<br>341<br>201<br>72<br>312<br>260<br>165<br>515<br>289 | PiCRV1-L/0.0/99/55<br>PiCRV1-N/6e-62/78/34.72<br>PiCRV1-40kDa/2e-148/99/62.28<br>PiCRV1-21kDa/5e-21/89/29.61<br>PiCRV1-8kDa/1e-15/100/52.78<br>PCLSaV-P5/4e-26/53/34.94<br>no hits<br>no hits<br>no hits<br>no hits |
| Hardy garden mum<br>( <i>Chrysanthemum<br/>morifolium</i> )  | <i>Dicot/Asteraceae</i>   | Chrysanthemum<br>trirhavirus 1/<br>ChTRV1 | PRJNA510496/<br>Shen R, China,<br>unpublished      | RNA1 6332<br>RNA2 4222<br><br><br><br><br>RNA3 5133     | BK064250<br>BK064251<br><br><br><br><br>BK064252     | L<br>N<br>P2<br>P3<br>P4<br>P6<br>P7<br>P8<br>P5        | 2047<br>441<br>348<br>189<br>72<br>265<br>194<br>528<br>354        | PiCRV1-L/0.0/99/58.11<br>PiCRV1-N/8e-73/77/37.29<br>PiCRV1-40kDa/7e-154/98/63.19<br>PiCRV1-21kDa/1e-31/90/35.84<br>PiCRV1-8kDa/3e-13/100/47.22<br>no hits<br>no hits<br>no hits<br>PCLSaV-P5/1e-25/47/37.43         |
| Sierra Nevada<br>wallflower<br>( <i>Erysimum nevadense</i> ) | <i>Dicot/Brassicaceae</i> | Erysimum<br>trirhavirus1/<br>EryTRV1      | PRJNA473238/<br>[109]                              | RNA1 6524<br>RNA2 3989<br><br><br><br><br>RNA3 4307     | BK064253<br>BK064254<br><br><br><br><br>BK064255     | L<br>N<br>P2<br>P3<br>P4<br>P6<br>P7<br>P8<br>P9        | 2039<br>441<br>346<br>198<br>94<br>316<br>199<br>509<br>143        | PiCRV1-L/0.0/99/66.22<br>PiCRV1-N/4e-111/79/45.98<br>PiCRV1-40kDa/2e-163/99/63.48<br>PiCRV1-21kDa/1e-36/85/39.18<br>PiCRV1-8kDa/3e-22/76/62.5<br>no hits<br>no hits<br>no hits<br>no hits                           |
| Lucerne<br>( <i>Medicago sativa</i> )                        | <i>Dicot/Fabaceae</i>     | Medicago<br>trirhavirus 1/<br>MeTRV1      | PRJNA667169/<br>[110]<br>and                       | RNA1 6495<br>RNA2 3851                                  | BK064256<br>BK064257                                 | L<br>N<br>P2                                            | 2040<br>445<br>343                                                 | PiCRV1-L/0.0/99/60.28<br>PiCRV1-N/2e-113/77/48.47<br>PiCRV1-40kDa/3e-149/97/60.90                                                                                                                                   |

|                                                  |                          |                                    |                                          |                                         |                                      |                                                   |                                                             |                                                                                                                                                                                 |
|--------------------------------------------------|--------------------------|------------------------------------|------------------------------------------|-----------------------------------------|--------------------------------------|---------------------------------------------------|-------------------------------------------------------------|---------------------------------------------------------------------------------------------------------------------------------------------------------------------------------|
|                                                  |                          |                                    | PRJNA535257/<br>JGI, USA,<br>unpublished | RNA3 4565                               | BK064258                             | P3<br>P4<br>P6<br>P7<br>P8<br>P5                  | 183<br>72<br>274<br>189<br>514<br>303                       | PiCRV1-21kDa/2e-26/96/32.78<br>PiCRV1-8kDa/1e-18/100/62.5<br>no hits<br>no hits<br>no hits<br>PCLSaV-P5/1e-14/52/33.33                                                          |
| Bristly ox-tongue<br>( <i>Picris echioides</i> ) | Dicot/ <i>Asteraceae</i> | Picris trirhavirus<br>1/<br>PiTRV1 | PRJNA772045/<br>[20]                     | RNA1 6530<br>RNA2 4091<br><br>RNA3 4259 | BK064259<br>BK064269<br><br>BK064261 | L<br>N<br>P2<br>P3<br>P4<br>P6<br>P7<br>P8<br>P10 | 2043<br>495<br>345<br>184<br>72<br>331<br>199<br>505<br>148 | PiCRV1-L/0.0/100/100<br>PiCRV1-N/0.0/72/100<br>PiCRV1-40kDa/0.0/100/100<br>PiCRV1-21kDa/5e-134/100/100<br>PiCRV1-8kDa/2e-42/100/100<br>no hits<br>no hits<br>no hits<br>no hits |

\* Acronyms of best hits are listed in Supp. Table S1.
