# Supplementary material for: Novel Tri-Segmented Rhabdoviruses: A Data Mining Expedition Unveils the Cryptic Diversity of Cytorhabdoviruses
Source: MDPI journal article supplement (doi:10.3390/v15122402), 2023-12-10
Supplement: s1 [file s1]

**Table 2.** Summary of novel betacytorhabdoviruses identified in plant RNA-seq data available on NCBI.

| Plant host                                       | Taxa/<br>family           | Virus name/<br>Abbreviation                     | Bioproject ID/<br>Data citation                        | Length<br>(nt) | Accession<br>number | Protein<br>ID                     | Length<br>(aa)                                 | Highest scoring virus-<br>protein/ <i>E</i> -value/query<br>coverage%/identity% (Blast<br>P)                                                            |
|--------------------------------------------------|---------------------------|-------------------------------------------------|--------------------------------------------------------|----------------|---------------------|-----------------------------------|------------------------------------------------|---------------------------------------------------------------------------------------------------------------------------------------------------------|
| Rock wormwood<br>( <i>Artemisia rupestris</i> )  | Dicot/ <i>Asteraceae</i>  | Artemisia<br>betacytorhabdovirus 1/<br>ArtBCRV1 | PRJNA730219/<br>[68]                                   | 13426          | BK064305            | N<br>P<br>P3<br>M<br>G<br>P6<br>L | 484<br>340<br>201<br>202<br>524<br>84<br>2076  | NCMV-N/2e-41/94/28.1<br>no hits<br>RudV1-P3/3e-09/62/26.72<br>no hits<br>PpVE-G/7e-24/89/22.67<br>no hits<br>RudV1-L/0.0/99/42.91                       |
| Zip begonia<br>( <i>Begonia conchifolia</i> )    | Dicot/ <i>Begoniaceae</i> | Begonia<br>betacytorhabdovirus 1/<br>BegBCRV1   | PRJEB26711/<br>[69]                                    | 13838          | BK064306            | N<br>P<br>P3<br>M<br>G<br>P6<br>L | 447<br>299<br>181<br>206<br>572<br>68<br>2161  | TiCRV1-N/5e-52/62/34.21<br>TiCRV1-P/2e-19/97/28.04<br>no hits<br>TiCRV1-M/7e-10/83/23.12<br>TiCRV1-G/2e-70/85/27.93<br>no hits<br>TiCRV1-L/0.0/99/41.72 |
| White birch<br>( <i>Betula pendula</i> )         | Dicot/ <i>Betulaceae</i>  | Betula<br>betacytorhabdovirus 1/<br>BetBCRV1    | PRJEB29260/<br>[70]                                    | 14744          | BK064307            | N<br>P<br>P3<br>M<br>G<br>P6<br>L | 449<br>485<br>195<br>196<br>556<br>138<br>2242 | RaCV-N/8e-69/90/34.24<br>no hits<br>RaCV-P4/6e-19/91/23.46<br>RaCV-M/1e-04/83/23.78<br>RaCV-G/3e-59/92/27.08<br>no hits<br>RaCV-L/0.0/92/40.01          |
| Himalayan birch<br>( <i>Betula utilis</i> )      | Dicot/ <i>Betulaceae</i>  | Betula<br>betacytorhabdovirus 2/<br>BetBCRV2    | PRJNA638802/<br>Kumar, N., CSIR,<br>India, unpublished | 15147          | BK064308            | N<br>P<br>P3<br>M<br>G<br>P6<br>L | 443<br>470<br>196<br>193<br>551<br>138<br>2246 | RaCV-N/2e-78/92/36.01<br>no hits<br>RaCV-P4/3e-22/89/28.41<br>RaCV-M/4e-08/86/25.68<br>RaCV-G/2e-53/87/27.44<br>no hits<br>RaCV-L/0.0/94/39.58          |
| Buffalo grass<br>( <i>Bouteloa dactyloides</i> ) | Monocot/ <i>Poaceae</i>   | Bouteloa<br>betacytorhabdovirus 1/<br>BouBCRV1  | PRJNA297834/<br>[71]                                   | 14127          | BK064309            | N<br>P<br>P3                      | 452<br>381<br>195                              | RudV1-N/2e-65/95/32.07<br>RVR-P/1e-07/17/33.33<br>RudV1-P3/9e-36/89/39.13                                                                               |

|                                                         |                                |                                                     |                                                                       |       |          |                                   |                                                |                                                                                                                                                   |
|---------------------------------------------------------|--------------------------------|-----------------------------------------------------|-----------------------------------------------------------------------|-------|----------|-----------------------------------|------------------------------------------------|---------------------------------------------------------------------------------------------------------------------------------------------------|
|                                                         |                                |                                                     |                                                                       |       |          | M<br>G<br>P6<br>P7<br>P8<br>L     | 199<br>508<br>72<br>255<br>190<br>2070         | RudV1-M/5e-28/84/34.32<br>NCMV-G/5e-21/94/23.43<br>no hits<br>no hits<br>no hits<br>RudV1-L/0.0/99/49.04                                          |
| Hardy garden mum<br>( <i>Chrysanthemum morifolium</i> ) | Dicot/ <i>Asteraceae</i>       | Chrysanthemum<br>betacytorhabdovirus 1/<br>ChrBCRV1 | PRJNA397042/<br>[72]                                                  | 13309 | BK064310 | N<br>P<br>P3<br>M<br>G<br>P6<br>L | 450<br>333<br>198<br>206<br>511<br>86<br>2075  | MaCyV-N/1e-45/92/30.07<br>RVR-P/0.007/26/29.55<br>TaEV1-P3/3e-11/67/29.93<br>no hits<br>PpVe-G/7e-22/69/24.66<br>no hits<br>RudV1-0.0/99/42.21    |
| Siberian hazelnut<br>( <i>Corylus heterophylla</i> )    | Dicot/ <i>Betulaceae</i>       | Corylus<br>betacytorhabdovirus 1/<br>CorBCRV1       | PRJNA899668/<br>Sun, J, Lianoning,<br>China, unpublished              | 15228 | BK064311 | N<br>P<br>P3<br>M<br>G<br>P6<br>L | 461<br>479<br>197<br>201<br>555<br>141<br>2257 | RaCV/7e-64/93/31.96<br>no hits<br>YmVA-P4/4e-14/71/28.97<br>RaCV-M/4e-04/87/21.59<br>PpVE-G/3e-73/94/27.58<br>no hits<br>RaCV-L/0.0/89/40.21      |
| Buffalo gourd<br>( <i>Cucurbita foetidissima</i> )      | Dicot/ <i>Cucurbitaceae</i>    | Cucurbita<br>betacytorhabdovirus 1/<br>CucBCRV1     | PRJNA473174/<br>Sun, University of<br>California, USA,<br>unpublished | 12969 | BK064312 | N<br>P<br>P3<br>M<br>G<br>P6<br>L | 450<br>302<br>195<br>209<br>514<br>79<br>2079  | MaCyV-N/1e-47/94/29.88<br>no hits<br>RudV1-P3/3e-08/59/31.03<br>RudV1-M/2e-06/71/27.81<br>RSMV-G/5e-22/93/23.35<br>no hits<br>RudV1-L/0.0/99/41.7 |
| Slipper orchid<br>( <i>Cypripedium flavum</i> )         | Monocot/ <i>Orchidaceae</i>    | Cypripedium<br>betacytorhabdovirus 1/<br>CypBCRV1   | PRJNA479379/<br>[73]                                                  | 9958  | BK064313 | N<br>P<br>P3<br>L                 | 430<br>280<br>198<br>2114                      | MYSV-N/1e-38/56/36<br>no hits<br>no hits<br>RaCV-L/0.0/91/33.81                                                                                   |
| Keladan<br>( <i>Dryobalanops oblongifolia</i> )         | Dicot/ <i>Dipterocarpaceae</i> | Dryobalanops<br>betacytorhabdovirus 1/<br>DryBCRV1  | PRJDB8182/<br>[74]                                                    | 14393 | BK064314 | N<br>P<br>P3<br>M<br>G            | 495<br>598<br>234<br>273<br>261                | YmVA-N/1e-95/98/35.8<br>YmVA-P/6e-07/23/32<br>YmVa-P4/1e-29/68/38.04<br>no hits<br>no hits                                                        |

|                                                             |                              |                                                   |                                                                      |       |          |                                   |                                               |                                                                                                                                                                          |
|-------------------------------------------------------------|------------------------------|---------------------------------------------------|----------------------------------------------------------------------|-------|----------|-----------------------------------|-----------------------------------------------|--------------------------------------------------------------------------------------------------------------------------------------------------------------------------|
|                                                             |                              |                                                   |                                                                      |       |          | L                                 | 2259                                          | YmVA-L/0.0/98/42.34                                                                                                                                                      |
| Durian<br>( <i>Durio zibethinus</i> )                       | Dicot/ <i>Malvaceae</i>      | Durio<br>betacytorhabdovirus 1/<br>DurBCRV1       | PRJNA400310/<br>[75]                                                 | 12791 | BK064315 | N<br>P<br>P3<br>M<br>G<br>P6<br>L | 434<br>318<br>193<br>174<br>539<br>62<br>2057 | NCMV-N/6e-52/97/33.03<br>no hits<br>PMuMaV-P3/8e-13/68/28.79<br>no hits<br>RSMV-G/6e-34/84/24.74<br>no hits<br>MYSV-L/0.0/98/45.16                                       |
| Littleleaf honey locust<br>( <i>Gleditsia microphylla</i> ) | Dicot/ <i>Fabaceae</i>       | Gleditsia<br>betacytorhabdovirus 1/<br>GleBCRV1   | PRJNA848854/<br>[76]                                                 | 13339 | BK064316 | N<br>P<br>P3<br>M<br>G<br>L       | 483<br>454<br>240<br>251<br>162<br>2240       | YmVA-N/9e86/99/33.61<br>no hits<br>YmVA-P4/6e-37/69/37.35<br>no hits<br>no hits<br>YmVA-L/0.0/99/40.15                                                                   |
| Chinese licorice<br>( <i>Glycyrrhiza inflata</i> )          | Dicot/ <i>Fabaceae</i>       | Glycyrrhiza<br>betacytorhabdovirus 1/<br>GlyBCRV1 | PRJNA574093/<br>[77]                                                 | 14755 | BK064317 | N<br>P<br>P3<br>M<br>G<br>L       | 493<br>500<br>238<br>280<br>169<br>2264       | YmVA-N/8e-95/96/37.89<br>YmVA-P/3e-25/19/57.14<br>YmVA-P4/2e-39/76/37.57<br>no hits<br>no hits<br>YmVA-L/0.0/98/42.05                                                    |
| Pennywort<br>( <i>Hepatica nobilis</i> )                    | Dicot/ <i>Ranunculaceae</i>  | Hepatica<br>betacytorhabdovirus 1/<br>HepBCRV1    | PRJDB6630/<br>Nodai Genome<br>Research Center,<br>Japan, unpublished | 10440 | BK064318 | N<br>P<br>P3<br>M<br>L            | 432<br>384<br>183<br>162<br>2074              | RVR-N/2e-77/92/35.78<br>CBDaV-P/6e-07/52/24.63<br>RVR-P3/9e-13/70/27.91<br>no hits<br>RVR-L/0.0/99/48.03                                                                 |
| Kentia palm<br>( <i>Howea forsteriana</i> )                 | Monocot/ <i>Arecaceae</i>    | Howea<br>betacytorhabdovirus 1/<br>HowBCRV1       | PRJNA244607/<br>[78]                                                 | 13727 | BK064319 | N<br>P<br>P3<br>M<br>G<br>P6<br>L | 447<br>301<br>173<br>211<br>557<br>69<br>2145 | TiCRV1-N/7e-46/53/36.86<br>TiCRV1-P/6e-10/95/24.76<br>TiCRV1-P3/5e-11/81/25.53<br>TiCRV1-M/1e-10/91/24.37<br>TiCRV1-G/1e-58/92/26.15<br>no hits<br>TiCRV1-L/0.0/99/40.22 |
| Sweet potato<br>( <i>Ipomoea batatas</i> )                  | Dicot/ <i>Convolvulaceae</i> | Ipomoea<br>betacytorhabdovirus 1/<br>IpoBCRV1     | PRJNA626066/<br>Read, ARC,<br>SouthAfrica,<br>unpublished            | 12811 | BK064320 | N<br>P<br>P3<br>M                 | 448<br>327<br>196<br>210                      | NCMV-N/2e-55/93/32.62<br>RVR-P/0.001/25/26.76<br>RudV1-P3/1e-06/56/30<br>RudV1-M/0.015/70/24.68                                                                          |

|                                                              |                             |                                                    |                                                      |       |          |                                              |                                                              |                                                                                                                                                                                  |
|--------------------------------------------------------------|-----------------------------|----------------------------------------------------|------------------------------------------------------|-------|----------|----------------------------------------------|--------------------------------------------------------------|----------------------------------------------------------------------------------------------------------------------------------------------------------------------------------|
|                                                              |                             |                                                    |                                                      |       |          | G<br>P6<br>L                                 | 533<br>101<br>2071                                           | RSMV-G/1e-22/86/22.76<br>no hits<br>TaEV1-1/0.0/99/41.46                                                                                                                         |
| Malabar nut<br>( <i>Justicia adhatoda</i> )                  | Dicot/ <i>Acanthaceae</i>   | Justicia<br>betacytorhabdovirus 1/<br>JusBCRV1     | PRJNA842169/<br>[79]                                 | 15957 | BK064321 | N<br>X<br>P<br>P3<br>M<br>G<br>P7<br>P8<br>L | 463<br>180<br>408<br>198<br>199<br>574<br>150<br>140<br>2236 | RaCV-N/3e-89/99/37.26<br>no hits<br>no hits<br>RaCV-P4/4e-31/95/31.94<br>RaCV-M/1e-08/83/23.7<br>RaCV-G/8e-96/89/32.44<br>RaCV-P7/1e-06/82/29.27<br>no hits<br>RaCV/0.0/96/45.34 |
| Royle's sedge<br>( <i>Kobresia royleana</i> )                | Monocot/ <i>Cyperaceae</i>  | Kobresia<br>betacytorhabdovirus 1/<br>KobBCRV1     | PRJNA588660/<br>Qu, G., Lhasa,<br>China, unpublished | 14255 | BK064322 | N<br>P<br>M<br>G<br>P5<br>L<br>P7            | 542<br>550<br>175<br>545<br>89<br>2098<br>106                | RSMV-N/7e-91/97/36.17<br>RSMV-P/8e-07/17/34.38<br>RSMV-M/0.003/88/26.28<br>RSMV-G/1e-124/94/39.24<br>no hits<br>RsMV-L/0.0/99/52.39<br>no hits                                   |
| Plate-seed conebrush<br>( <i>Leucadendron platyspermum</i> ) | Dicot/ <i>Proteaceae</i>    | Leucadendron<br>betacytorhabdovirus 1/<br>LeuBCRV1 | PRJEB45774/<br>[80]                                  | 12698 | BK064323 | N<br>P<br>P3<br>M<br>G<br>P6<br>L            | 445<br>408<br>192<br>188<br>533<br>63<br>2081                | NCMV-N/1e-115/93/43.97<br>NCMV-P/2e-32/72/31.76<br>NCMV-P3/3e-09/76/26.35<br>TaEV1-M/8e-08/86/26.83<br>RSMV-G/9e-34/94/26.07<br>no hits<br>RudV1-L/0.0/99/42.01                  |
| Black goji<br>( <i>Lycium ruthenicum</i> )                   | Dicot/ <i>Solanaceae</i>    | Lycium<br>betacytorhabdovirus 1/<br>LycBCRV1       | PRJNA505629/<br>[81]                                 | 14855 | BK064324 | N<br>P<br>P3<br>M<br>G<br>L                  | 504<br>515<br>239<br>286<br>208<br>2260                      | YmVA-N/2e-78/92/35.16<br>YmVA-P/1e-20/22/45.76<br>YmVA-P4/2e-37/95/34.06<br>YmVA-M/0.003/67/23.35<br>no hits<br>YmVA-L/0.0/98/41.21                                              |
| Mango<br>( <i>Mangifera indica</i> )                         | Dicot/ <i>Anacardiaceae</i> | Mango<br>betacytorhabdovirus 1/<br>ManBCRV1        | PRJNA487154/<br>[82]                                 | 13826 | BK064325 | N<br>P<br>P3<br>M                            | 477<br>359<br>167<br>195                                     | YmVA-N/8e-35/84/26.25<br>no hits<br>no hits<br>no hits                                                                                                                           |

|                                                      |                              |                                                            |                                                                                 |       |          |                                         |                                                     |                                                                                                                                                                                       |
|------------------------------------------------------|------------------------------|------------------------------------------------------------|---------------------------------------------------------------------------------|-------|----------|-----------------------------------------|-----------------------------------------------------|---------------------------------------------------------------------------------------------------------------------------------------------------------------------------------------|
|                                                      |                              |                                                            |                                                                                 |       |          | G<br>P6<br>L                            | 577<br>95<br>2148                                   | RVR-G/7e-20/78/22.41<br>no hits<br>RaCV-L/0.0/94/35.18                                                                                                                                |
| White mulberry<br>( <i>Morus alba</i> )              | Dicot/ <i>Moraceae</i>       | Morus<br>betacytorhabdovirus 1/<br>MorBCRV1                | PRJNA597172/<br>[83]                                                            | 15904 | BK064326 | N<br>P<br>P3<br>M<br>G<br>L             | 502<br>617<br>231<br>263<br>215<br>2260             | YmVA-N/8e-99/91/36.15<br>YmVA-P/5e-32/74/29.3<br>YmVA-P4/5e-39/84/37.44<br>no hits<br>no hits<br>YmVA-L/0.0/98/43.14                                                                  |
| Nitre bush<br>( <i>Nitraria tangutorum</i> )         | Dicot/ <i>Nitrariaceae</i>   | Nitraria<br>betacytorhabdovirus 1/<br>NitBCRV1             | PRJNA686177/<br>[84]                                                            | 15520 | BK064327 | N<br>P<br>P3<br>M<br>G<br>P6<br>L       | 433<br>544<br>189<br>187<br>583<br>153<br>2246      | RaCV-N/2e-121/99/42.96<br>RaCV-P/2e-14/51/27.97<br>RaCV-P4/1e-38/95/37.57<br>RaCV-M/2e-21/95/30.56<br>RaCV-G/6e-98/86/34.9<br>RaCV-P7/3e-09/59/32.97<br>RaCV-L/0.0/99/44.89           |
| Hall's panicgrass<br>( <i>Panicum hallii</i> )       | Monocot/ <i>Poaceae</i>      | Panicum<br>betacytorhabdovirus 1/<br>PanBCRV1              | PRJNA306692/<br>[85]                                                            | 12136 | BK064328 | N<br>P<br>P3<br>M<br>G<br>L             | 418<br>280<br>195<br>172<br>505<br>2068             | CBDaV-N/0.0/99/72.9<br>CBDaV-P/2e-128/100/66.07<br>CBDaV-P3/3e-104/94/75.14<br>CBDaV-M/1e-83/98/68.05<br>CBDaV-G/0.0/100/66.14<br>CBDaV-L/0.0/100/75.87                               |
| Blue passionflower<br>( <i>Passiflora caerulea</i> ) | Dicot/ <i>Passifloraceae</i> | Passiflora<br>betacytorhabdovirus 1/<br>PasBCRV1           | PRJEB21674/<br>1000 Plant (1KP)<br>Transcriptomes<br>Initiative,<br>Unpublished | 13471 | BK064329 | N<br>P<br>P3<br>P4<br>M<br>G<br>P7<br>L | 500<br>317<br>188<br>69<br>209<br>541<br>72<br>2138 | TiCRV1-N/8e-130/92/44.49<br>TiCRV1-P/6e-35/89/32.77<br>TiCRV1-P3/1e-22/80/29.14<br>no hits<br>TiCRV1-M/5e-48/85/47.19<br>TiCRV1-G/4e-160/90/44.85<br>no hits<br>TiCRV1-L/0.0/99/62.66 |
| Peat soil                                            | -                            | Peat soil associated<br>betacytorhabdovirus 1/<br>PSaBCRV1 | PRJNA412438/<br>[86]                                                            | 12663 | BK064330 | N<br>P<br>P3<br>M<br>G<br>P6            | 436<br>315<br>186<br>169<br>505<br>56               | MYSV-N/5e-96/99/38.79<br>NCMV-P/2e-26/86/31.62<br>BYSMV-P3/1e-21/78/36.99<br>MYSV-M/7e-09/94/24.07<br>MaCyV-G/2e-75/95/31.43<br>no hits                                               |

|                                                         |                                     |                                                            |                                                        |       |          |                                               |                                                             |                                                                                                                                                                                         |
|---------------------------------------------------------|-------------------------------------|------------------------------------------------------------|--------------------------------------------------------|-------|----------|-----------------------------------------------|-------------------------------------------------------------|-----------------------------------------------------------------------------------------------------------------------------------------------------------------------------------------|
|                                                         |                                     |                                                            |                                                        |       |          | L                                             | 2083                                                        | MaCyV-L/0.0/99/53.75                                                                                                                                                                    |
| Peat soil                                               | -                                   | Peat soil associated<br>betacytorhabdovirus 2/<br>PSaBCRV2 | PRJNA570134/<br>JGI, USA,<br>unpublished               | 14865 | BK064331 | N<br>P<br>P3<br>M<br>G<br>P6<br>P7<br>P8<br>L | 457<br>397<br>194<br>199<br>516<br>66<br>276<br>182<br>2066 | RudV1-N/2e-65/88/33.41<br>BYSMV-P/4e-09/26/35.51<br>RudV1-P3/9e-29/78/36.84<br>RudV1-M/2e-21/88/31.64<br>PpVe-G/8e-35/82/25.61<br>no hits<br>no hits<br>no hits<br>RudV1-L/0.0/99/50.63 |
| <i>Pentaphragma spicatum</i>                            | Dicot/<br><i>Pentaphragmataceae</i> | Pentaphragma<br>betacytorhabdovirus 1/<br>PenBCRV1         | PRJNA636634/<br>[87]                                   | 12983 | BK064332 | N<br>P<br>P3<br>M<br>G<br>P6<br>L             | 446<br>288<br>178<br>197<br>550<br>63<br>2160               | TiCRV1-N/2e-50/57/34.91<br>TiCRV1-P/8e-17/87/27.21<br>no hits<br>TiCRV1-M/0.008/84/25.44<br>TiCRV1-G/3e-76/91/30.18<br>no hits<br>TiCRV1-L/0.0/99/41.12                                 |
| Amur cork tree<br>( <i>Phellodendron<br/>amurense</i> ) | Dicot/ <i>Rutaceae</i>              | Phellodendron<br>betacytorhabdovirus 1/<br>PheBCRV1        | PRJNA817294/<br>[88]                                   | 14292 | BK064333 | N<br>P<br>P3<br>M<br>G<br>L                   | 488<br>541<br>241<br>294<br>251<br>2258                     | YmVA-N/1e-85/97/34.43<br>YmVA-P/3e-40/61/34.47<br>YmVA-P4/7e-30/78/32.28<br>no hits<br>no hits<br>YmVA-L/0.0/98/41.42                                                                   |
| Desert poplar<br>( <i>Populus pruinosa</i> )            | Dicot/ <i>Salicaceae</i>            | Populus<br>betacytorhabdovirus 1/<br>PopBCRV1              | PRJNA354971/<br>Yu, L., Lanzhou,<br>China, unpublished | 15094 | BK064334 | N<br>P<br>P3<br>M<br>G<br>P6<br>L             | 432<br>569<br>188<br>201<br>586<br>150<br>2246              | RaCV-N/8e-118/99/42.73<br>RaCV-P/6e-10/50/22.37<br>RaCV-P4/1e-33/90/34.71<br>RaCV-M/1e-17/85/26.59<br>RaCV-G/2e-102/92/32.84<br>RaCV-P7/2e-10/78/31.15<br>RaCV-L/0.0/99/45.75           |
| Kudzu<br>( <i>Pueraria montana</i> )                    | Dicot/ <i>Fabaceae</i>              | Pueraria<br>betacytorhabdovirus 1/<br>PueBCRV1             | PRJNA515956/<br>[89]                                   | 13614 | BK064335 | N<br>P<br>P3<br>M<br>G<br>L                   | 481<br>338<br>230<br>255<br>166<br>2254                     | YmVA-N/1e-69/97/33.74<br>YmVA-P/8e-11/75/41.35/<br>YmVA-P4/3e-20/58/36.57<br>no hits<br>no hits<br>YmVA-L/0.0/98/39.88                                                                  |

|                                                         |                               |                                                          |                      |       |          |                                         |                                                      |                                                                                                                                                                                |
|---------------------------------------------------------|-------------------------------|----------------------------------------------------------|----------------------|-------|----------|-----------------------------------------|------------------------------------------------------|--------------------------------------------------------------------------------------------------------------------------------------------------------------------------------|
| Sesame<br>( <i>Sesamum indicum</i> )                    | Dicot/ <i>Pedaliaceae</i>     | Sesamum<br>betacytorhabdovirus<br>1_Ses/<br>SesBCRV1_Ses | PRJNA644139/<br>[90] | 13565 | BK064336 | N<br>P<br>P3<br>P4<br>M<br>G<br>L       | 439<br>340<br>183<br>76<br>224<br>575<br>2113        | CuCV1-N/5e-72/95/34.95<br>YmCaV-P/9e-15/58/30.10<br>SbBMV-P3/2e-28/73/41.18<br>no hits<br>CuCV1-M/1e-23/75/30.59<br>YmCaV-G/2e-100/84/35.74<br>CuCV1-L/0.0/99/48.07            |
| Madagascar periwinkle<br>( <i>Catharanthus roseus</i> ) | Dicot/ <i>Apocynaceae</i>     | Sesamum<br>betacytorhabdovirus<br>1_Cat/<br>SesBCRV1_Cat | PRJNA246273/<br>[91] | 13497 | BK064337 | N<br>P<br>P3<br>P4<br>M<br>G<br>L       | 440<br>340<br>183<br>76<br>224<br>575<br>2113        | CuCV1-N/1e-71/95/35.33<br>YmCaV-P/9e-15/58/30.10<br>SbBMV-P3/9e-28/73/41.18<br>no hits<br>CuCV1-M/7e-24/75/30.59<br>YmCaV-G/3e-100/84/35.95<br>CuCV1-L/0.0/99/48.02            |
| <i>Schiedea pentandra</i>                               | Dicot/ <i>Caryophyllaceae</i> | Schiedea<br>betacytorhabdovirus 1/<br>SchBCRV1           | PRJNA491458<br>[92]  | 12964 | BK064338 | N<br>P<br>P3<br>M<br>G<br>L<br>P7       | 439<br>379<br>206<br>182<br>524<br>2062<br>114       | MYSV-N/3e-55/93/33.01<br>NCMV-P/6e-95/98/42.89<br>RVR-P3/8e-10/62/30.47<br>no hits<br>RSMV-G/1e-32/95/24.86<br>RudV1-L/0.0/99/43.63<br>no hits                                 |
| Japanese pagoda tree<br>( <i>Sophora japonica</i> )     | Dicot/ <i>Fabaceae</i>        | Sophora<br>betacytorhabdovirus 1/<br>SopBCRV1            | PRJNA797104/<br>[93] | 13767 | BK064339 | N<br>P<br>P3<br>M<br>G<br>L             | 501<br>493<br>241<br>283<br>137<br>2255              | YmVA-N/3e-94/91/36.54<br>YmVA-P/2e-37/72/31.27<br>YmVA-P4/1e-39/93/35.29<br>YmVA-M/0.001/61/24.57<br>no hits<br>YmVA-L/0.0/97/41.79                                            |
| Red clover<br>( <i>Trifolium pratense</i> )             | Dicot/ <i>Fabaceae</i>        | Trifolium<br>betacytorhabdovirus 1/<br>TriBCRV1          | PRJNA561285/<br>[94] | 13511 | BK064340 | N<br>P<br>P3<br>M<br>G<br>P6<br>L<br>P8 | 429<br>372<br>218<br>176<br>529<br>72<br>2069<br>175 | BYSMV-N/4e-46/90/34.43<br>CBDaV-P/6e-06/30/26.55<br>PMuMaV-P3/5e-19/66/31.65<br>AntAmV1-M/4e-04/66/25.42<br>RSMV-G/4e-37/91/25.2<br>no hits<br>BYSMV-L/0.0/99/45.15<br>no hits |

|                                                                 |                        |                                                   |                      |       |          |                             |                                         |                                                                                                                       |
|-----------------------------------------------------------------|------------------------|---------------------------------------------------|----------------------|-------|----------|-----------------------------|-----------------------------------------|-----------------------------------------------------------------------------------------------------------------------|
| Broad bean<br>( <i>Vicia faba</i> )                             | Dicot/ <i>Fabaceae</i> | Vicia<br>betacytorhabdovirus 1/<br>VicBCRV1       | PRJNA591424/<br>[95] | 12101 | BK064341 | N<br>P<br>P3<br>M<br>L      | 434<br>441<br>186<br>164<br>2099        | MaCyV-N/3e-60/95/31.13<br>RVR-P/0.035/16/30.99<br>RVR-P3/8e-22/75/34.04<br>no hits<br>CBDaV-L/0.0/98/44.27            |
| Japanese prickly ash<br>( <i>Zanthoxylum<br/>ailanthoides</i> ) | Dicot/ <i>Rutaceae</i> | Zanthoxylum<br>betacytorhabdovirus 1/<br>ZanBCRV1 | PRJNA656412/<br>[96] | 16669 | BK064342 | N<br>P<br>P3<br>M<br>G<br>L | 488<br>627<br>243<br>276<br>278<br>2278 | YmVA-N/1e-88/92/33.98<br>YmVA-P/2e-25/22/47.18<br>YmVA-P4/9e-26/70/33.53<br>no hits<br>no hits<br>YmVA-L/0.0/98/41.48 |
| Japanese prickly ash<br>( <i>Zanthoxylum<br/>ailanthoides</i> ) | Dicot/ <i>Rutaceae</i> | Zanthoxylum<br>betacytorhabdovirus 2/<br>ZanBCRV2 | PRJNA656412/<br>[96] | 15584 | BK064343 | N<br>P<br>P3<br>M<br>G<br>L | 492<br>579<br>242<br>270<br>281<br>2280 | YmVA-N/8e-88/91/35.01<br>YmVA-P/6e-37/61/33.33<br>YmVA-P4/8e-27/68/37.35<br>no hits<br>no hits<br>YmVA-L/0.0/98/40.79 |
| Japanese prickly ash<br>( <i>Zanthoxylum<br/>ailanthoides</i> ) | Dicot/ <i>Rutaceae</i> | Zanthoxylum<br>betacytorhabdovirus 3/<br>ZanBCRV3 | PRJNA656412/<br>[96] | 16283 | BK064344 | N<br>P<br>P3<br>M<br>G<br>L | 492<br>578<br>242<br>272<br>283<br>2282 | YmVA-N/3e-88/98/34.2<br>YmVA-P/6e-27/17/57.84<br>YmVA-P4/2e-24/80/32.82<br>no hits<br>no hits<br>YmVA-L/0.0/99/41.24  |

\* Acronyms of best hits are listed in Supp. Table S1.
