# Supplementary material for: Novel Tri-Segmented Rhabdoviruses: A Data Mining Expedition Unveils the Cryptic Diversity of Cytorhabdoviruses
Source: MDPI journal article supplement (doi:10.3390/v15122402), 2023-12-10
Supplement: s1 [file s1]

**Table 1.** Summary of novel alphacytorhabdoviruses identified from plant RNA-seq data available on NCBI.

| Plant host                                           | Taxa/<br>family          | Virus name/<br>Abbreviation                      | Bioproject ID/<br>Data citation                             | Length (nt) | Accession<br>number | Protein<br>ID                           | Length<br>(aa)                                       | Highest scoring virus-<br>protein/ <i>E</i> -value/query<br>coverage%/identity% (Blast<br>P)                                                                                                          |
|------------------------------------------------------|--------------------------|--------------------------------------------------|-------------------------------------------------------------|-------------|---------------------|-----------------------------------------|------------------------------------------------------|-------------------------------------------------------------------------------------------------------------------------------------------------------------------------------------------------------|
| Greater burdock<br>( <i>Arctium lappa</i> )          | Dicot/ <i>Asteraceae</i> | Arctium<br>alphacytorhabdovirus 1/<br>ArcACRV1   | PRJNA598011/<br>[41]                                        | 12768       | BK064262            | N<br>P<br>P'<br>P3<br>M<br>G<br>L       | 450<br>300<br>115<br>225<br>182<br>552<br>2097       | WhIV5-N/0.0/91/63.07<br>SaV1-P/1e-100/100/50.67<br>no hits<br>TrARV1-P3/6e-93/97/59.91<br>CnV2-M/2e-54/98/47.49<br>TrARV1-G/0.0/98/55.09<br>WhIV5-L/0.0/99/64.42                                      |
| Silvery wormwood<br>( <i>Artemisia argyi</i> )       | Dicot/ <i>Asteraceae</i> | Artemisia<br>alphacytorhabdovirus 1/<br>ArtACRV1 | PRJNA397671/<br>[42]                                        | 12978       | BK064263            | N<br>P<br>P3<br>M<br>G<br>L             | 454<br>315<br>307<br>184<br>552<br>2074              | LNyV-N/0.0/88/60.30<br>LNyV-P/9e-91/93/50.68<br>LNyV-P3/2e-119/96/54.52<br>LNyV-M/2e-48/96/45.76<br>LNyV-G/0.0/99/51.18<br>LNyV-L/0.0/99/68.25                                                        |
| Common wormwood<br>( <i>Artemisia montana</i> )      | Dicot/ <i>Asteraceae</i> | Artemisia<br>alphacytorhabdovirus 2/<br>ArtACRV2 | PRJDB8414/<br>Kyoto<br>University,<br>Japan,<br>unpublished | 14344       | BK064264            | N<br>P<br>P'<br>P3<br>M<br>G<br>P6<br>L | 479<br>343<br>88<br>241<br>182<br>569<br>64<br>2086  | RVCV-N/1e-175/98/51.95<br>RCVC-P/1e-84/92/44.55<br>RVCV-P'/2e-10/64/49.12<br>RVCV-P3/2e-74/78/56.08<br>RVCV-M/1e-49/83/50.66<br>RVCV-G/0.0/92/55.51<br>RVCV-P6/3e-11/90/44.83<br>RVCV-L/0.0/99/64.72  |
| Sievers wormwood<br>( <i>Artemisia sieversiana</i> ) | Dicot/ <i>Asteraceae</i> | Artemisia<br>alphacytorhabdovirus 3/<br>ArtACRV3 | PRJNA834888/<br>[43]                                        | 14339       | BK064265            | N<br>P<br>P'<br>P3<br>M<br>G<br>P6<br>L | 476<br>342<br>103<br>240<br>185<br>571<br>64<br>2089 | RVCV-N/2e-171/98/50.62<br>RCVC-P/6e-82/93/43.69<br>RVCV-P'/3e-13/66/54.93<br>RVCV-P3/3e-75/82/52.40<br>RVCV-M/1e-52/82/51.97<br>RVCV-G/0.0/91/56.76<br>RVCV-P6/7e-14/100/48.44<br>RVCV-L/0.0/99/63.43 |
| Desert broom<br>( <i>Baccharis sarothroides</i> )    | Dicot/ <i>Asteraceae</i> | Baccharis<br>alphacytorhabdovirus 1/             | PRJNA716650/                                                | 13581       | BK064266            | N<br>P                                  | 470<br>297                                           | CCyV1-N/1e-153/87/52.68<br>CCyV1-P/2e-56/98/40.74                                                                                                                                                     |

|                                                          |                             |                                                      |                                                                                    |       |          |                                         |                                                      |                                                                                                                                                                                                                 |
|----------------------------------------------------------|-----------------------------|------------------------------------------------------|------------------------------------------------------------------------------------|-------|----------|-----------------------------------------|------------------------------------------------------|-----------------------------------------------------------------------------------------------------------------------------------------------------------------------------------------------------------------|
|                                                          |                             | BacACRV1                                             | Romero, M.,<br>UNAM,<br>Mexico,<br>unpublished                                     |       |          | P'<br>P3<br>M<br>G<br>L                 | 85<br>337<br>168<br>550<br>2074                      | no hits<br>StrV2-P3/4e-120/93/56.78<br>CCyV1-M/5e-34/95/38.65<br>CCyV1-G/1e-160/92/43.14<br>CCyV1-L/0.0/99/59.24                                                                                                |
| Large bittercress<br>( <i>Cardamine amara</i> )          | Dicot/ <i>Brassicaceae</i>  | Cardamine<br>alphacytorhabdovirus 1/<br>CarACRV1     | PRJDB4989/<br>[44]                                                                 | 13209 | BK064267 | N<br>P<br>P'<br>P3<br>M<br>G<br>P6<br>L | 457<br>316<br>109<br>224<br>164<br>569<br>70<br>2092 | PaCRV1-N/0.0/99/72.35<br>PaCRV1-P/5e-134/63.26<br>PaCRV1-P'/1e-21/48.11<br>PaCRV1-P3/8e-122/98/75.57<br>PaCRV1-M/1e-89/100/73.78<br>PaCRV1-G/0.0/95/75.64<br>PaCRV1-P6/5e-26/97/63.24<br>PaCRV1-L/0.0/100/78.30 |
| Greater celandine<br>( <i>Chelidonium majus</i> )        | Dicot/ <i>Papaveraceae</i>  | Chelidonium<br>alphacytorhabdovirus 1/<br>CheACRV1   | PRJNA376854/<br>Zhao, L., Jinlin,<br>China,<br>unpublished                         | 12148 | BK064268 | N<br>P<br>P'<br>P3<br>M<br>G<br>P6<br>L | 415<br>325<br>71<br>200<br>169<br>552<br>66<br>2072  | TpVA-N/0.0/100/70.19<br>TpVA-P/2e-146/100/63.38<br>no hits<br>TpVA-P3/8e-117/98/80.71<br>TpVA-M/2e-73/92/69.43<br>TpVA-G/0.0/98/71.72<br>GILV1-P6/2e-14/100/57.58<br>TpVA-L/0.0/100/80.41                       |
| Indian chrysanthemum<br>( <i>Chrysanthemum indicum</i> ) | Dicot/ <i>Asteraceae</i>    | Chrysanthemum<br>alphacytorhabdovirus 1/<br>ChrACRV1 | PRJNA361213/<br>[45]                                                               | 12715 | BK064269 | N<br>P<br>P'<br>P3<br>M<br>G<br>L       | 448<br>301<br>140<br>225<br>19<br>549<br>2097        | WhIV5-N/0.0/99/60.22<br>SaV1-P/4e-100/99/51<br>no hits<br>TrARV1-P3/1e-91/97/57.92<br>CnV2-M/6e-50/91/45.60<br>SaV1-G/0.0/100/53.42<br>WhIV5-L/0.0/99/63.89                                                     |
| Bear corn<br>( <i>Conopholis americana</i> )             | Dicot/ <i>Orobanchaceae</i> | Conopholis<br>alphacytorhabdovirus 1/<br>ConACRV1    | PRJEB21674/<br>1000 Plant<br>(1KP)<br>Transcriptomes<br>Initiative,<br>Unpublished | 13083 | BK064270 | N<br>P<br>P'<br>P3<br>M<br>G<br>L       | 467<br>299<br>87<br>328<br>166<br>546<br>2076        | CCyV1-N/1e-157/94/49.1<br>CCyV1-P/4e-70/100/42.35<br>no hits<br>StrV2-P3/3e-119/83/60.58<br>BCRV2-M/7e-32/93/38.06<br>CCyV1-G/8e-151/99/40.26<br>CCyV1-L/0.0/98/58.75                                           |

|                                                      |                                |                                                  |                                                                             |       |          |                                         |                                                      |                                                                                                                                                                                    |
|------------------------------------------------------|--------------------------------|--------------------------------------------------|-----------------------------------------------------------------------------|-------|----------|-----------------------------------------|------------------------------------------------------|------------------------------------------------------------------------------------------------------------------------------------------------------------------------------------|
| Cardoon<br>( <i>Cynara cardunculus</i> )             | Dicot/ <i>Asteraceae</i>       | Cynara<br>alphacytorhabdovirus 1/<br>CynACRV1    | PRJNA590905/<br>[46]                                                        | 13726 | BK064271 | N<br>P<br>P'<br>P3<br>M<br>G<br>L       | 472<br>311<br>132<br>350<br>179<br>562<br>2144       | TCRV1/0.0/100/80.08<br>TCRV1-P/3e-153/100/69.97<br>TCRV1-P'/1e-23/75/53.54<br>TCRV1-P3/0.0/99/80<br>TCRV1-M/3e-100/100/78.77<br>TCRV1-G/0.0/98/70.40<br>TCRV1-L/0.0/98/83.25       |
| Fischer's spurge<br>( <i>Euphorbia fischeriana</i> ) | Dicot/ <i>Euphorbiaceae</i>    | Euphorbia<br>alphacytorhabdovirus 1/<br>EupACRV1 | PRJNA693977/<br>[47]                                                        | 13713 | BK064272 | N<br>P<br>P3<br>P4<br>M<br>G<br>P7<br>L | 451<br>330<br>223<br>130<br>184<br>559<br>41<br>2089 | PeVA-N/0.0/95/68.41<br>PeVA-P/2e-100/99/53.62<br>PeVA-P3/1e-84/100/55.61<br>no hits<br>PeVA-M/5e-57/96/48.88<br>PeVA-G/0.0/95/68.35<br>no hits<br>PeVA-L/0.0/99/69.3               |
| Tikoua fig<br>( <i>Ficus tikoua</i> )                | Dicot/ <i>Moraceae</i>         | Ficus alphacytorhabdovirus<br>1/<br>FicACRV1     | PRJNA432314/<br>Bai, Y.,<br>Guiyang<br>University,<br>China,<br>unpublished | 13839 | BK064274 | N<br>P<br>P'<br>P3<br>M<br>G<br>P6<br>L | 458<br>316<br>84<br>228<br>182<br>563<br>69<br>2097  | SCV-N/1e-140/97/48.80<br>SCV-P/3e-52/88/36.51<br>no hits<br>SCV-P3/2e-75/100/50.43<br>SCV-M/7e-43/82/48.67<br>SCV-G/0.0/94/50.46<br>ADV-P6/3e-09/98/42.03<br>SCV-L/0.0/99/60.22    |
| Garlic<br>( <i>Allium sativum</i> )                  | Monocot/ <i>Amaryllidaceae</i> | Garlic alphacytorhabdovirus<br>1/<br>GarACRV1    | PRJNA772184/<br>Liu, T., IBFC,<br>China,<br>unpublished                     | 13400 | BK064275 | N<br>P<br>P3<br>M<br>G<br>L             | 468<br>298<br>329<br>174<br>554<br>2075              | LNYV-N/3e-160/93/53.17<br>TpVB-P/4e-53/94/34.80<br>StrV2-P3/5e-126/98/58.28<br>LNYV-M/3e-35/97/40.94<br>TpVB-G/5e-175/98/44.97<br>LYMV-L/0.0/99/58.43                              |
| Herb bennet<br>( <i>Geum urbanum</i> )               | Dicot/ <i>Rosaceae</i>         | Geum alphacytorhabdovirus<br>1/<br>GeuACRV1      | PRJEB23354/<br>[48]                                                         | 12756 | BK064276 | N<br>P<br>P'<br>P3<br>M<br>G<br>L       | 459<br>295<br>98<br>319<br>177<br>546<br>2093        | StrV2-N/0.0/98/73.57<br>StrV2-P/7e-128/100/60.34<br>StrV2-P'/3e-22/98/55.67<br>StrV2-P3/1e-171/100/74.22<br>BCRV2-M/7e-78/92/68.29<br>BCRV2-G/0.0/96/69.57<br>BCRV2-L/0.0/99/72.89 |

|                                                   |                             |                                                       |                                                                                    |       |          |                                               |                                                            |                                                                                                                                                                                                         |
|---------------------------------------------------|-----------------------------|-------------------------------------------------------|------------------------------------------------------------------------------------|-------|----------|-----------------------------------------------|------------------------------------------------------------|---------------------------------------------------------------------------------------------------------------------------------------------------------------------------------------------------------|
| English ivy<br>( <i>Hedera helix</i> )            | Dicot/ <i>Araliaceae</i>    | Hedera<br>alphacytorhabdovirus 1/<br>HedACRV1         | PRJEB21674/<br>1000 Plant<br>(1KP)<br>Transcriptomes<br>Initiative,<br>Unpublished | 12588 | BK064277 | N<br>P<br>P'<br>P3<br>M<br>G<br>L             | 459<br>295<br>98<br>319<br>172<br>546<br>2100              | StrV2-N/0.0/97/71.27<br>StrV2-P/3e-128/100/61.02<br>StrV2-P'/2e-22/98/53.61<br>StrV2-P3/2e-171/100/74.30<br>BCRV2-M/2e-78/99/65.50<br>BCRV2-G/0.0/99/68.19<br>BCRV2-L/0.0/98/72.95                      |
| Plum-leaved holly<br>( <i>Ilex asprella</i> )     | Dicot/ <i>Aquifoliaceae</i> | Ilex alphacytorhabdovirus 1/<br>IleACRV1              | PRJNA736810/<br>[49]                                                               | 14540 | BK064278 | N<br>P<br>P'<br>P3<br>M<br>G<br>P6<br>L<br>P8 | 452<br>333<br>93<br>370<br>184<br>553<br>54<br>2137<br>134 | AcCV-N/0.0/99/56.87<br>AcCV-P/1e-67/96/39.76<br>no hits<br>AcCV-P3/1e-130/99/52.49<br>AcCV-1e-33/99/37.30<br>AcCV-G/0.0/96/49.06<br>no hits<br>AcCV-L/0.0/98/60.77<br>no hits                           |
| Lucerne<br>( <i>Medicago sativa</i> )             | Dicot/ <i>Fabaceae</i>      | Medicago<br>alphacytorhabdovirus 1/<br>MedACRV1       | PRJNA644634/<br>[50]                                                               | 13586 | BK064279 | N<br>P<br>P'<br>P3<br>M<br>G<br>P6<br>L       | 431<br>360<br>64<br>224<br>191<br>547<br>80<br>2085        | StrV1-N/0.0/97/60.48<br>StrV1-1e-73/98/39.12<br>StrV1-P'/2e-13/100/54.69<br>StrV1-P3/7e-81/99/52.47<br>StrV1-M/5e-43/83/44.65<br>StrV1-G/0.0/99/60.44<br>StrV1-P6/6e-11/76/45.9<br>StrV1-L/0.0/99/68.21 |
| Horse mint<br>( <i>Mentha longifolia</i> )        | Dicot/ <i>Lamiaceae</i>     | Mentha<br>alphacytorhabdovirus 1/<br>MenACRV1         | PRJNA779119/<br>Wang, B.,<br>Shaoguan<br>University,<br>unpublished                | 12387 | BK064280 | N<br>P<br>P'<br>P3<br>M<br>G<br>P6<br>L       | 422<br>316<br>101<br>195<br>163<br>551<br>67<br>2072       | TpVA-N/9e-163/100/54.14<br>TpVA-/7e-45/96/32.18<br>no hits<br>TpVA-P3/6e-68/97/55.38<br>GILV1-M/6e38/95/45.16<br>TpVA-G0.0/97/55.84<br>GILV1-P6/4e-07/100/50.75<br>TpVA-L/0.0/99/62.64                  |
| Indian mulberry<br>( <i>Morinda officinalis</i> ) | Dicot/ <i>Rubiaceae</i>     | Morinda<br>alphacytorhabdovirus<br>1_Mor/MorACRV1_Mor | PRJNA717096/<br>[51]                                                               | 13023 | BK064281 | N<br>P<br>P'<br>P3                            | 463<br>300<br>81<br>346                                    | CCyV1-N/0.0/99/56.87<br>CCyV1-P/7e-68/98/42.71<br>no hits<br>BCRV2-P3/1e-115/76/59.7                                                                                                                    |

|                                                        |                             |                                                      |                                                                                     |       |          |                                         |                                                     |                                                                                                                                                                                                |
|--------------------------------------------------------|-----------------------------|------------------------------------------------------|-------------------------------------------------------------------------------------|-------|----------|-----------------------------------------|-----------------------------------------------------|------------------------------------------------------------------------------------------------------------------------------------------------------------------------------------------------|
|                                                        |                             |                                                      |                                                                                     |       |          | M<br>G<br>L                             | 172<br>548<br>2075                                  | CCyV1-M/7e-29/92/37.58<br>CCyV1-G/6e-171/93/45.14<br>CCyV1-L/0.0/99/59.16                                                                                                                      |
| Chinese holly<br>( <i>Ilex cornuta</i> )               | Dicot/ <i>Aquifoliaceae</i> | Morindaalphacytorhabdovirus 1_Ile/MorACRV1_Ile       | PRJNA399054/<br>[52]                                                                | 12876 | BK064282 | N<br>P<br>P'<br>P3<br>M<br>G<br>L       | 463<br>300<br>85<br>346<br>184<br>549<br>2075       | CCyV1-N/0.0/99/56.29<br>CCyV1-P/1e-66/98/43.39<br>no hits<br>BCRV2-P3/2e-116/76/60.08<br>CCyV1-M/2e-27/88/36.31<br>CCyV1-G/7e-167/98/43.57<br>CCyV1-L/0.0/99/59.16                             |
| Oak<br>( <i>Quercus robur</i> )                        | Dicot/ <i>Fagaceae</i>      | Oak alphacytorhabdovirus 1/<br>OakACRV1              | PRJNA322128/<br>[53]                                                                | 12817 | BK064283 | N<br>P<br>P'<br>P3<br>M<br>G<br>L       | 453<br>304<br>104<br>376<br>176<br>543<br>2078      | LYMV-N/2e-109/93/40.47<br>LYMV-P/1e-20/88/29.58<br>no hits<br>AscSyV1-P3/2e-46/66/35.97<br>CCyV1-M/3e-06/59/28.57<br>TrARV1-G/3e-7/98/30.16<br>BCRV2-L/0.0/99/45.57                            |
| Holy basil<br>( <i>Ocimum tenuiflorum</i> )            | Dicot/ <i>Lamiaceae</i>     | Ocimum<br>alphacytorhabdovirus 1/<br>OciACRV1        | PRJNA251328/<br>[54]                                                                | 12478 | BK064284 | N<br>P<br>P'<br>P3<br>M<br>G<br>P6<br>L | 425<br>327<br>93<br>205<br>155<br>563<br>60<br>2078 | KePCyV-N/0.0/99/76.65<br>KePCyV-P/1e-116/99/54.41<br>no hits<br>KePCyV-P3/1e-105/99/70.53<br>KePCyV-M/5e-58/98/56.21<br>KePCyV-G/0.0/96/70.46<br>StrV1-P6/2e-08/83/50<br>KePCyV-L/0.0/99/77.36 |
| Scented pelargonium<br>( <i>Pelargonium X hybrid</i> ) | Dicot/ <i>Geraniaceae</i>   | Pelargonium<br>alphacytorhabdovirus 1/<br>PelACRV1   | PRJNA883637/<br>Saint-Marcoux,<br>D., Lyon<br>University,<br>France,<br>unpublished | 12332 | BK064285 | N<br>P<br>P'<br>P3<br>M<br>G<br>P6<br>L | 413<br>328<br>84<br>203<br>170<br>552<br>58<br>2073 | TpVA-N/1e-164/98/56.23<br>TpVA-P/2e-53/97/36.25<br>no hits<br>TpVA-P3/2e-91/96/68.02<br>TpVA.M/5e-37/90/44.81<br>TpVA-G/0.0/95/60.71<br>no hits<br>TpVA-L/0.0/99/63.7                          |
| Moso bamboo<br>( <i>Phyllostachys edulis</i> )         | Monocot/ <i>Poaceae</i>     | Phyllostachys<br>alphacytorhabdovirus 1/<br>PhyACRV1 | PRJNA350353/<br>[55]                                                                | 12947 | BK064286 | N<br>P<br>P'                            | 455<br>296<br>83                                    | LNyV-N/2e-138/97/46.55<br>LNyV-P/2e-44/93/37.28<br>no hits                                                                                                                                     |

|                                                     |                          |                                                               |                      |       |          |                                         |                                                     |                                                                                                                                                                                |
|-----------------------------------------------------|--------------------------|---------------------------------------------------------------|----------------------|-------|----------|-----------------------------------------|-----------------------------------------------------|--------------------------------------------------------------------------------------------------------------------------------------------------------------------------------|
|                                                     |                          |                                                               |                      |       |          | P3<br>M<br>G<br>L                       | 328<br>193<br>544<br>2070                           | StrV2-P3/7e-140/96/59.81<br>LNYV-M/6e-28/90/34.27<br>StrV2-G/8e-144/90/40.93<br>BCRV2-L/0.0/99/57.21                                                                           |
| Peltate green dragon<br>( <i>Pinellia peltata</i> ) | Monocot/ <i>Araceae</i>  | Pinellia<br>alphacytorhabdovirus 1/<br>PinACRV1               | PRJNA623739/<br>[56] | 13438 | BK064287 | N<br>P<br>P'<br>P3<br>M<br>G<br>P6<br>L | 479<br>305<br>87<br>373<br>170<br>568<br>61<br>2106 | AscSyV1-N/4e-131/90/44.24<br>DV1-P/8e-47/98/36.75<br>no hits<br>AscSyV1-P3/9e-105/89/47.51<br>TCRV1-M/1e-05/88/31.21<br>WhIV4/2e-134/95/36.73<br>no hits<br>WhIV4/0.0/99/48.13 |
| Patchouli<br>( <i>Pogostemom cablin</i> )           | Dicot/ <i>Lamiaceae</i>  | Pogostemom<br>alphacytorhabdovirus<br>1_Pog/<br>PogACRV1_Pog  | PRJNA660501/<br>[57] | 13171 | BK064288 | N<br>P<br>P'<br>P3<br>M<br>G<br>L       | 462<br>300<br>81<br>347<br>179<br>557<br>2070       | CCyV1-N/0.0/99/55.17<br>CCyV1-P/1e-69/96/40.79<br>no hits<br>StrV2-P3/3e-116/77/61.94<br>CCyV1-M/3e-38/92/36.14<br>CCyV1-G/1e-160/93/40.92<br>CCyV1-L/0.0/58.03                |
| Black pepper<br>( <i>Piper nigrum</i> )             | Dicot/ <i>Piperaceae</i> | Pogostemom<br>alphacytorhabdovirus 1_<br>Pip/<br>PogACRV1_Pip | PRJNA580359/<br>[58] | 13063 | BK064289 | N<br>P<br>P'<br>P3<br>M<br>G<br>L       | 462<br>300<br>81<br>347<br>179<br>557<br>2070       | CCyV1-N/0.0/99/54.96<br>CCyV1-P/3e-67/99/40.79<br>no hits<br>StrV2-P3/3e-116/77/62.31<br>CCyV1-M/5e-39/87/39.74<br>CCyV1-G/7e-164/91/42.88<br>CCyV1-L/0.0/58.75                |
| Tropical soda apple<br>( <i>Solanum viarum</i> )    | Dicot/ <i>Solanaceae</i> | Pogostemom<br>alphacytorhabdovirus 1_Sol/<br>PogACRV1_Sol     | PRJNA666394/<br>[59] | 13138 | BK064290 | N<br>P<br>P'<br>P3<br>M<br>G<br>L       | 462<br>300<br>116<br>351<br>179<br>558<br>2070      | CCyV1-N/3e-179/99/54.84<br>CCyV1-P/5e-63/99/39.79<br>no hits<br>StrV2-P3/4e-115/76/61.57<br>CCyV1-M/4e-40/87/40.38<br>CCyV1-G/2e-157/95/40.98<br>CCyV1-L/0.0/58.31             |
| Patchouli<br>( <i>Pogostemom cablin</i> )           | Dicot/ <i>Lamiaceae</i>  | Pogostemom<br>alphacytorhabdovirus 2/<br>PogACRV2             | PRJNA660501/<br>[57] | 13209 | BK064291 | N<br>P<br>P'                            | 421<br>359<br>64                                    | StrV1-N/0.0/98/78.71<br>StrV1-P/8e-164/100/66.12<br>StrV1-P'/9e-25/100/73.44                                                                                                   |

|                                                      |                           |                                                              |                                                                    |       |          |                                         |                                                     |                                                                                                                                                                                   |
|------------------------------------------------------|---------------------------|--------------------------------------------------------------|--------------------------------------------------------------------|-------|----------|-----------------------------------------|-----------------------------------------------------|-----------------------------------------------------------------------------------------------------------------------------------------------------------------------------------|
|                                                      |                           |                                                              |                                                                    |       |          | P3<br>M<br>G<br>P6<br>L                 | 224<br>179<br>549<br>69<br>2083                     | StrV1-P3/4e-134/100/81.7<br>StrV1-M/2e-82/99/65.36<br>StrV1-G/0.0/100/74.05<br>StrV1-P6/2e-31/100/72.46<br>StrV1-L/0.0/99/82.4                                                    |
| Patchouli<br>( <i>Pogostemom cablin</i> )            | Dicot/ <i>Lamiaceae</i>   | Pogostemom<br>alphacytorhabdovirus<br>3_Pog/<br>PogACRV3_Pog | PRJNA511937/<br>[60]                                               | 13252 | BK064292 | N<br>P<br>P'<br>P3<br>M<br>G<br>P6<br>L | 449<br>293<br>86<br>353<br>165<br>544<br>71<br>2110 | BmV1/0.0/99/71.05<br>BmV1-P/1e-127/100/64.85<br>BmV1-P'/5e-20/100/52.33<br>BmV1-P3/0.0/96/72.14<br>BmV1-M/1e-53/93/51.3<br>BmV1-G/0.0/95/71.43<br>no hits<br>BmV1-L/0.0/99/72.52  |
| Crepe myrtle<br>( <i>Lagerstroemia indica</i> )      | Dicot/ <i>Lythraceae</i>  | Pogostemom<br>alphacytorhabdovirus<br>3_Lag/<br>PogACRV3_Lag | PRJNA32094/<br>[61]                                                | 13149 | BK064293 | N<br>P<br>P'<br>P3<br>M<br>G<br>P6<br>L | 449<br>294<br>86<br>353<br>180<br>544<br>71<br>2108 | BmV1/0.0/99/72.20<br>BmV1-P/1e-128/100/63.61<br>BmV1-P'/3e-23/100/55.81<br>BmV1-P3/0.0/96/72.14<br>BmV1-M/4e-55/83/55.63<br>BmV1-G/0.0/95/70.10<br>no hits<br>BmV1-L/0.0/99/72.04 |
| Candelabra primrose<br>( <i>Primula chungensis</i> ) | Dicot/ <i>Primulaceae</i> | Primula<br>alphacytorhabdovirus1/<br>PriACRV1                | PRJNA616180/<br>Wang, X., BI,<br>Kunming,<br>China,<br>unpublished | 12953 | BK064294 | N<br>P<br>P'<br>P3<br>M<br>G<br>L       | 450<br>307<br>103<br>311<br>174<br>549<br>2066      | LYMV-N/0.0/99/72.1<br>LYMV-P/2e-127/98/61.26<br>no hits<br>LYMV-P3/2e-161/100/70.74<br>LYMV-M/2e-68/98/56.4<br>LYMV-G/0.0/98/60.19<br>LYMV-L/0.0/100/73.91                        |
| Glory primrose<br>( <i>Primula oreodoxa</i> )        | Dicot/ <i>Primulaceae</i> | Primula<br>alphacytorhabdovirus 2/<br>PriACRV2               | PRJNA544868/<br>[62]                                               | 12146 | BK064295 | N<br>P<br>P'<br>P3<br>M<br>G<br>L       | 414<br>327<br>82<br>201<br>167<br>559<br>2072       | TpVA-N/1e-160/98/54.57<br>GILV1-P/2e-51/99/33.63<br>no hits<br>TpVA-P3/4e-86/98/64.5<br>GILV1-M/5e-42/91/43.79<br>GILV1-G/0.0/94/58.87<br>TpVA-L0.0/99/64.58                      |
| Beach rose                                           | Dicot/ <i>Rosaceae</i>    | Rose                                                         | PRJNA498442/                                                       | 12601 | BK064296 | N                                       | 425                                                 | TpVA-N/7e-152/98/51.78                                                                                                                                                            |

|                                                   |                             |                                                    |                                                         |       |          |                                         |                                                     |                                                                                                                                                                                       |
|---------------------------------------------------|-----------------------------|----------------------------------------------------|---------------------------------------------------------|-------|----------|-----------------------------------------|-----------------------------------------------------|---------------------------------------------------------------------------------------------------------------------------------------------------------------------------------------|
| ( <i>Rosa rugosa</i> )                            |                             | alphacytorhabdovirus 1/<br>RosACRV1                | [63]                                                    |       |          | P<br>P'<br>P3<br>M<br>G<br>P6<br>L      | 313<br>80<br>167<br>172<br>593<br>67<br>2068        | TpVA-P/3e-56/95/37.38<br>no hits<br>GILV1-P3/4e-67/97/57.83<br>TpVA-M/5e-27/100/34.48<br>GILV1-G/0.0/94/50.45<br>GILV1-P6/1e-04/100/41.79<br>TpVA-L/0.0/99/64.85                      |
| Korean bramble<br>( <i>Rubus coreanus</i> )       | Dicot/ <i>Rosaceae</i>      | Rubus<br>alphacytorhabdovirus 1/<br>RubACRV1       | PRJNA401210/<br>[64]                                    | 14682 | BK064297 | N<br>P<br>P'<br>P3<br>M<br>G<br>P6<br>L | 474<br>297<br>93<br>366<br>186<br>573<br>64<br>2109 | DV1-N/91/3e-108/40.14<br>DV1-P/2e-38/98/33.22<br>DV1-P'/0.029/88/32.56<br>BmV1-P3/2e-106/93/45.45<br>DV1-M/5e-10/81/28.1<br>WhIV4-G/6e-154/93/41.2<br>no hits<br>WhIV4-L/0.0/99/47.44 |
| Barbed skullcap<br>( <i>Scutellaria barbata</i> ) | Dicot/ <i>Lamiaceae</i>     | Scutellaria<br>alphacytorhabdovirus 1/<br>ScuACRV1 | PRJNA653305/<br>[65]                                    | 13187 | BK064298 | N<br>P<br>P'<br>P3<br>M<br>G<br>P6<br>L | 447<br>295<br>86<br>350<br>165<br>547<br>75<br>2103 | BmV1-N/0.0/99/68.6<br>BmV1-P/4e-121/100/61.36<br>BmV1-P'/3e-24/100/53.49<br>BmV1-P3/0.0/98/72.46<br>BmV1-M/9e-52/93/50.65<br>BmV1-G/0.0/95/70.86<br>no hits<br>BmV1-0.0/99/71.44      |
| Piggyback plant<br>( <i>Tolmiea menziesii</i> )   | Dicot/ <i>Saxifragaceae</i> | Tolmiea<br>alphacytorhabdovirus 1/<br>TolACRV1     | PRJNA507776/<br>[66]                                    | 12746 | BK064299 | N<br>P<br>P'<br>P3<br>M<br>G<br>L       | 460<br>295<br>102<br>333<br>182<br>545<br>2091      | StrV2-N/0.0/97/67.11<br>BCRV2-P/4e-130/100/62.03<br>StrV2-P'/3e-19/96/43.88<br>BCRV2-P3/7e-166/94/72.01<br>BCRV2-M/3e-78/92/67.86<br>BCRV2-G/0.0/96/73.14<br>BCRV2-L/0.0/99/77.05     |
| Wheat<br>( <i>Triticum aestivum</i> )             | Monocot/ <i>Poaceae</i>     | Triticum<br>alphacytorhabdovirus 1/<br>TriACRV1    | PRJNA577739/<br>Li, Y., Hebei,<br>China,<br>unpublished |       | BK064300 | N<br>P<br>P'<br>P3<br>M<br>G            | 474<br>315<br>87<br>345<br>190<br>561               | AscSyV1-N/1e-134/93/44.02<br>DV1-P/2e-47/97/36.81<br>DV1-P'/0.021/97/34.12<br>AscSyV1-P3/5e-109/90/48.96<br>BmV1-M/3e-07/98/27.15<br>DV1-G/6e-130/86/39.64                            |



|                                                              |                                |                                                                         |                                                                              |       |          |                                         |                                                     |                                                                                                                                                                                                  |
|--------------------------------------------------------------|--------------------------------|-------------------------------------------------------------------------|------------------------------------------------------------------------------|-------|----------|-----------------------------------------|-----------------------------------------------------|--------------------------------------------------------------------------------------------------------------------------------------------------------------------------------------------------|
|                                                              |                                |                                                                         |                                                                              |       |          | P6<br>L                                 | 55<br>2106                                          | no hits<br>WhIV4-L/0.0/98/48.4                                                                                                                                                                   |
| Long-leaved bladderwort<br>( <i>Utricularia longifolia</i> ) | Dicot/ <i>Lentibulariaceae</i> | Utricularia<br>alphacytorhabdovirus 1/<br>UtrACRV1                      | PRJNA354080/<br>Tang, C.,<br>Nanjing<br>University,<br>China,<br>unpublished | 13017 | BK064301 | N<br>P<br>P3<br>M<br>G<br>P6<br>L       | 454<br>324<br>217<br>203<br>571<br>63<br>2089       | PaCRV1-N/4e-157/98/49.89<br>PaCRV1-P/6e-57/100/35.17<br>PaCRV1-P3/2e73/98/52.47<br>PaCRV1-M/1e-46/80/41.1<br>PaCRV1-G/0.0/98/48.23<br>no hits<br>PaCRV1-L/0.0/98/59.1                            |
| Wetland metagenome                                           | -                              | Wetland metagenome<br>associated<br>alphacytorhabdovirus 1/<br>WMaACRV1 | PRJNA338276/<br>[67]                                                         | 12726 | BK064302 | N<br>P<br>P'<br>P3<br>M<br>G<br>P6<br>L | 445<br>301<br>99<br>219<br>172<br>551<br>52<br>2093 | PeVA-N/4e-174/89/57.39<br>PeVA-P/1e-71/99/43.93<br>no hits<br>PeVA-P3/1e-60/98/44.39<br>PeVA-M/2e-45/99/43.93<br>PeVA-G/0.0/95/53.86<br>no hits<br>PeVA-L/0.0/99/62.45                           |
| Malabar cardamon<br>( <i>Wurfbainia villosa</i> )            | Monocot/ <i>Zingiberaceae</i>  | Wurfbainia<br>alphacytorhabdovirus 1/<br>WurACRV1                       | PRJNA471573/<br>Wang, H.,<br>Guangzhou,<br>China,<br>unpublished             | 13348 | BK064303 | N<br>P<br>P'<br>P3<br>M<br>G<br>P6<br>L | 465<br>297<br>93<br>356<br>187<br>546<br>85<br>2116 | BmV1-N/0.0/98/60.87<br>BmV1-P/6e-81/99/46.49<br>BmV1-P'/1e-09/89/43.37<br>BmV1-P3/8e-143/97/56.32<br>BmV1-M/1e-19/81/32.68<br>BmV1-G/0.0/96/57.47<br>no hits<br>BmV1-L/0.0/99/56.5               |
| Maize<br>( <i>Zea mays</i> )                                 | Monocot/ <i>Poaceae</i>        | Zea alphacytorhabdovirus 1/<br>ZeaACRV1                                 | PRJNA543910/<br>Wang, J.,<br>Anhui, China,<br>unpublished                    | 14358 | BK064304 | N<br>P<br>P'<br>P3<br>M<br>G<br>P6<br>L | 477<br>329<br>93<br>242<br>181<br>573<br>64<br>2085 | RVCV-N/0.0/97/53.45<br>RVCV-P/3e-90/96/46.5<br>RVCV-P'/1e-05/50/48.94<br>RVCV-P3/6e-78/82/54.5<br>RVCV-M/6e-48/96/48.28<br>RVCV-G/0.0/95/55.21<br>RVCV-P6/5e-11/100/42.19<br>RVCV-L/0.0/99/65.42 |

\* Acronyms of best hits are listed in Supp. Table S1.
