# Supplementary material for: Novel Tri-Segmented Rhabdoviruses: A Data Mining Expedition Unveils the Cryptic Diversity of Cytorhabdoviruses
Source: MDPI journal article supplement (doi:10.3390/v15122402), 2023-12-10
Supplement: s1 [file s1]

**Table 5.** Consensus conserved plant rhabdovirus gene junction sequences

| Proposed Genus                | Virus*   | 3'end mRNA    | intergenic spacer  | 5'end mRNA |
|-------------------------------|----------|---------------|--------------------|------------|
| <i>Alphacytotorhabdovirus</i> | ArcACRV1 | AAUUAUUUU     | GAU                | CUU        |
|                               | ArtACRV1 | AAUUCUUUU     | GA(U) <sub>n</sub> | CNN        |
|                               | ArtACRV2 | AAUUAUUUU     | GA(U) <sub>n</sub> | CNN        |
|                               | ArtACRV3 | AAUUAUUUU     | GA(U) <sub>n</sub> | CNU        |
|                               | BacACRV1 | AAUUCUUUU     | GA(U) <sub>n</sub> | CNC        |
|                               | CarACRV1 | AAUUAUUUU     | GAU                | CUU        |
|                               | CheACRV1 | AAUUAUUUU     | GAU                | CUU        |
|                               | ChrACRV1 | AAUUAUUUU     | GAU                | CUU        |
|                               | ConACRV1 | AAUUCUUUU     | GAU                | CNC        |
|                               | CynACRV1 | AAUU(C/A)UUUU | GA(U) <sub>n</sub> | CNN        |
|                               | EupACRV1 | AAUUAUUUU     | GAU                | CUU        |
|                               | FagACRV1 | AAUUAUUUU     | GAU                | CNN        |
|                               | FicACRV1 | AAUUAUUUU     | GAU                | CNN        |
|                               | GarACRV1 | AAUUCUUUU     | GN(U) <sub>n</sub> | CNN        |
|                               | GeuACRV1 | AAUUCUUUU     | GAU                | CNC        |
|                               | HedACRV1 | AAUUCUUUU     | GNU                | CNC        |
|                               | IleACRV1 | AAUUAUUUU     | GA(U) <sub>n</sub> | CUG        |
|                               | MedACRV1 | AAUUAUUUU     | GAU                | CNN        |
|                               | MenACRV1 | AAUUAUUUU     | GAU                | CUU        |
|                               | MorACRV1 | AAUUCUUUU     | GNU                | CNN        |
|                               | OakACRV1 | AAUUAUUUU     | GAU                | CUU        |
|                               | OciACRV1 | AAUUAUUUU     | GAU                | CUU        |
|                               | PelACRV1 | AAUUAUUUU     | GAU                | CUN        |
|                               | PhyACRV1 | AAUUCUUUU     | GAU                | CUC        |
|                               | PinACRV1 | AAUUAUUUU     | GN(U) <sub>n</sub> | CU(U/G)    |
|                               | PogACRV1 | AAUUCUUUU     | G(N) <sub>n</sub>  | CUC        |
|                               | PogACRV2 | AAUUAUUUU     | GAU                | CNN        |
|                               | PogACRV3 | AAUUAUUUU     | GAU                | CNG        |
|                               | PriACRV1 | AAUUCUUUU     | GA(U) <sub>n</sub> | CUN        |
|                               | PriACRV2 | CAUUAUUUU     | GAU                | CUG        |
|                               | RosACRV1 | AAUUAUUUU     | GAU                | CUN        |
|                               | RubACRV1 | AAUUAUUUU     | GNU                | CNN        |
|                               | ScuACRV1 | AAUUAUUUU     | G(N) <sub>n</sub>  | CNN        |
|                               | TolACRV1 | AAUUCUUUU     | GNU                | CUC        |
|                               | TriACRV1 | AAUUAUUUU     | GA(U) <sub>n</sub> | CU(G/U)    |
|                               | UtrACRV1 | AAUUAUUUU     | GA(U) <sub>n</sub> | CNN        |
|                               | WMaACRV1 | AAUUCUUUU     | GAU                | CUU        |
|                               | WurACRV1 | AAUUAUUUU     | GN(U) <sub>n</sub> | CNN        |
|                               | ZeaACRV1 | AUUUAUUUU     | GA(U) <sub>n</sub> | CNN        |
|                               | AcCV     | AAUUAUUUU     | GAU                | CUG        |
|                               | ADV      | AAUUAUUUU     | GAU                | CUU        |
|                               | AscSyV1  | AAUUAUUUU     | GNU                | CNN        |
|                               | BCRV2    | AAUUCUUUU     | GNU                | CNN        |
|                               | BmV1     | AAUUAUUUU     | GAN                | CUG        |
|                               | CCyV1    | AAUUCUUUU     | G(N) <sub>n</sub>  | CUU        |
|                               | ChYDaV   | AAUUAUUUU     | GAU                | CUN        |
|                               | CCRV1    | AAUUAUUUU     | GAU                | CUU        |
|                               | CnV2     | AAUUAUUUU     | GAU                | CUN        |
|                               | DV1      | AAUUAUUUU     | GAU                | CUG        |
|                               | GILV1    | AAUUAUUUU     | GAU                | CUU        |
|                               | HpLV     | AAUUAUUUU     | GAU                | CNN        |

|                            |          |               |                    |       |
|----------------------------|----------|---------------|--------------------|-------|
|                            | KePCyV   | AAUUAUUUU     | GAU                | CUU   |
|                            | LNyV     | AAUUCUUUU     | G(N) <sub>n</sub>  | CUU   |
|                            | LYMoV    | AAUUCUUUU     | G(N) <sub>n</sub>  | CUN   |
|                            | NymAV1   | AUUAAUUUU     | GAU                | CUN   |
|                            | PaCRV1   | AAUUAUUUU     | GAU                | CUU   |
|                            | PCaCV    | AAUUAUUUU     | GNU                | CUN   |
|                            | PeVA     | AAUUAUUUU     | G(N) <sub>n</sub>  | CUN   |
|                            | PNSaV    | AAUUAUUUU     | GAU                | CUN   |
|                            | RVCV     | AUUUAUUUU     | GAU                | CUU   |
|                            | SaV1     | AUUUAUUUU     | GAU                | CNN   |
|                            | SCV      | AAUUAUUUU     | GAU                | CUU   |
|                            | StrV1    | AAUUAUUUU     | GAU                | CUU   |
|                            | StrV2    | AAUUCUUUU     | GNU                | CNN   |
|                            | TCRV1    | AAUUAUUUU     | GAU                | CNN   |
|                            | TpVA     | AAUUAUUUU     | GAU                | CUU   |
|                            | TpVB     | AAUUCUUUU     | G(N) <sub>n</sub>  | CUN   |
|                            | TrARV1   | AAUUAUUUU     | GAU                | CUU   |
|                            | TYMaV    | AAUUAUUUU     | GAU                | CUU   |
|                            | WhIV4    | AAUUAUUUU     | GNU                | CUU   |
|                            | WhIV5    | AAUUAUUUU     | GAU                | CNN   |
|                            | WhIV6    | AAUUAUUUU     | GAU                | CUN   |
| <i>Betacytorhabdovirus</i> | ArtBCRV1 | AUUCUUUUU     | GUU                | CUU   |
|                            | BegBCRV1 | AUAUUUUUU     | GN                 | CUN   |
|                            | BetBCRV1 | AUUCUUUUU     | GG(U) <sub>n</sub> | CUG   |
|                            | BetBCRV2 | AUUCUUUUU     | GG(U) <sub>n</sub> | CUG/A |
|                            | BouBCRV1 | AUUCUUUUU     | GCU                | CUG   |
|                            | ChrBCRV1 | AUUCUUUUU     | GUU                | CUU   |
|                            | CorBCRV1 | AUUCUUUUU     | GGUU               | CUG   |
|                            | CucBCRV1 | AUUCUUUUU     | G(N) <sub>n</sub>  | CUU   |
|                            | CypBCRV1 | UUCUUUUUU     | GA                 | CUC   |
|                            | DryBCRV1 | AUUAUUUUU     | GGU                | CCU   |
|                            | DurBCRV1 | AUUCUUUUU     | GA                 | CUC   |
|                            | GleBCRV1 | AUUAUUUUU     | GG(U) <sub>n</sub> | CUN   |
|                            | GlyBCRV1 | AUUAUUUUU     | GGU                | CCU   |
|                            | HepBCRV1 | AUUAUUUUU     | GA(U) <sub>n</sub> | CUU   |
|                            | HowBCRV1 | AUAUUUUUU     | GA                 | CUN   |
|                            | IpoBCRV1 | AUUCUUUUU     | GUU                | CUN   |
|                            | JusBCRV1 | AUU(A/C)UUUUU | GGUU               | CUN   |
|                            | KobBCRV1 | AUUCUUUUU     | GGN                | CUC   |
|                            | Leu CRV1 | AUUCUUUUU     | GA                 | CUC   |
|                            | LycBCRV1 | AUUAUUUUU     | GGU                | CCU   |
|                            | ManBCRV1 | AUUAUUUUU     | GG(U) <sub>n</sub> | CUN   |
|                            | MorBCRV1 | AUUAUUUUU     | GGU                | CCU   |
|                            | NitBCRV1 | AUUCUUUUU     | GGUU               | CUN   |
|                            | PanBCRV1 | AUUCUUUUU     | G(G/A)             | CUC   |
|                            | PasBCRV1 | AUAUUUUUU     | GAUU               | CUC   |
|                            | PSaBCRV1 | AUUUAUUUU     | GA                 | CUC   |
|                            | PSaBCRV2 | AUUUAUUUU     | GNU                | CUN   |
|                            | PenBCRV1 | AUAUUUUUU     | G(N) <sub>n</sub>  | CUU   |
|                            | PheBCRV1 | AUUAUUUUU     | GGUU               | CUC   |
|                            | PopBCRV1 | AUUCUUUUU     | GG(U) <sub>n</sub> | CUN   |
|                            | PueBCRV1 | AUUAUUUUU     | GGU                | CCU   |
|                            | SesBCRV1 | UUCUUUUUU     | GA                 | CUN   |
|                            | SchBCRV1 | AUUCUUUUU     | GA                 | CUC   |

|                             |          |           |                      |          |
|-----------------------------|----------|-----------|----------------------|----------|
|                             | SopBCRV1 | AUUUUUUUU | GGU                  | CCU      |
|                             | TriBCRV1 | AUUCUUUUU | GN                   | CUN      |
|                             | VicBCRV1 | AUUCUUUUU | GG                   | CUC      |
|                             | ZanBCRV1 | AUUUUUUUU | GGU                  | CCU      |
|                             | ZanBCRV2 | AUUUUUUUU | GGU                  | CCU      |
|                             | ZanBCRV3 | AUUUUUUUU | GGU                  | CCU      |
|                             | AntAmV1  | AUUUUUUUU | GCU                  | CUU      |
|                             | AriACRV  | UUUUUUUUU | GN(N) <sub>n</sub>   | CNN      |
|                             | BeTaV1   | UUUUUUUUU | GA                   | CUC      |
|                             | BYSMV    | AUUUUUUUU | GA                   | CUC      |
|                             | CBDaV    | AUUCUUUUU | GG                   | CUC      |
|                             | CuCV1    | AUUUUUUUU | GA                   | CUC      |
|                             | MaCyV    | AUUCUUUUU | GA                   | CUC      |
|                             | MYSV     | AUUUUUUUU | GA                   | CUC      |
|                             | NCMV     | AUUCUUUUU | GA                   | CUC      |
|                             | PMuMaV   | AUUUUUUUU | G(N) <sub>n</sub>    | CUA      |
|                             | PpVE     | AUUCUUUUU | GAC                  | CCU      |
|                             | RaCV     | AUUCUUUUU | G(N) <sub>n</sub>    | CUN      |
|                             | RVR      | AUUUAUUUU | GA                   | CUC      |
|                             | RSMV     | AUUCUUUUU | GCU                  | CUG      |
|                             | RudV1    | AUUCUUUUU | GGUU(N) <sub>n</sub> | CUN      |
|                             | SbBMV    | UUUUUUUUU | GA                   | CAC      |
|                             | TaEV1    | AUUCUUUUU | GG(N) <sub>n</sub>   | CUN      |
|                             | TiCRV1   | AUUUUUUUU | GA(N) <sub>n</sub>   | CUC      |
|                             | YmCaV    | UUUUUUUUU | GA                   | CUC      |
|                             | YmVA     | AUUCUUUUU | GGU                  | CCU      |
| <i>Gammacytorhabdovirus</i> | ArgGCRV1 | AUUCUUUUU | AAU                  | CCU      |
|                             | CarGCRV1 | AUUCUUUUU | A(N) <sub>n</sub>    | CCU      |
|                             | CelGCRV1 | AUUCUUUUU | A(N) <sub>n</sub>    | CNU      |
|                             | CopGCRV1 | AUUCUUUUU | A(N) <sub>n</sub>    | CCU      |
|                             | CusGCRV1 | AUUCUUUUU | A(N) <sub>n</sub>    | CNN      |
|                             | CusGCRV2 | AUUCUUUUU | A(N) <sub>n</sub>    | CCU      |
|                             | CypGCRV1 | AAUCUUUUU | A(N) <sub>n</sub>    | CNN      |
|                             | EpiGCRV1 | AUUCUUUUU | AUGU                 | CCU      |
|                             | FraGCRV1 | AUUCUUUUU | A(N) <sub>n</sub>    | CNU      |
|                             | FraGCRV2 | AUUCUUUUU | A(N) <sub>n</sub>    | CCU      |
|                             | HelGCRV1 | AUUCUUUUU | A(N) <sub>n</sub>    | CCU      |
|                             | HibGCRV1 | AUUCUUUUU | A(N) <sub>n</sub>    | CNN      |
|                             | LonGCRV1 | AUUCUUUUU | A(N) <sub>n</sub>    | CCU      |
|                             | LupGCRV1 | AUUCUUUUU | A(N) <sub>n</sub>    | CCU      |
|                             | Rh GCRV1 | AUUUCUUUU | A(N) <sub>n</sub>    | CCU      |
|                             | SilGCRV1 | AUUCUUUUU | A(N) <sub>n</sub>    | CCU      |
|                             | GymDenV1 | AAUCUUUUU | A(N) <sub>n</sub>    | CNN      |
|                             | TrAV1    | AUUCUUUUU | A(N) <sub>n</sub>    | CNU      |
| <i>Trirhavirus</i>          | AlTRV1   | AAUUCUUUU | GN(N) <sub>n</sub>   | CUC      |
|                             | ChTRV1   | AAUUCUUUU | GN(N) <sub>n</sub>   | CCU      |
|                             | EryTRV1  | AAUUCUUUU | GN(N) <sub>n</sub>   | CUC      |
|                             | MeTRV1   | AAUUCUUUU | GN(N) <sub>n</sub>   | CU (C/G) |
|                             | PiTRV1   | AAUUCUUUU | GN(N) <sub>n</sub>   | CUN      |

The consensus gene junction sequences of the viruses identified in this study are highlighted in light grey. \* Names and abbreviations of newly identified viruses are listed in Tables 1-4; while the names and abbreviations of known viruses are listed in Supp Table 1.
