# Supplementary material for: Novel Tri-Segmented Rhabdoviruses: A Data Mining Expedition Unveils the Cryptic Diversity of Cytorhabdoviruses
Source: MDPI journal article supplement (doi:10.3390/v15122402), 2023-12-10

**A**

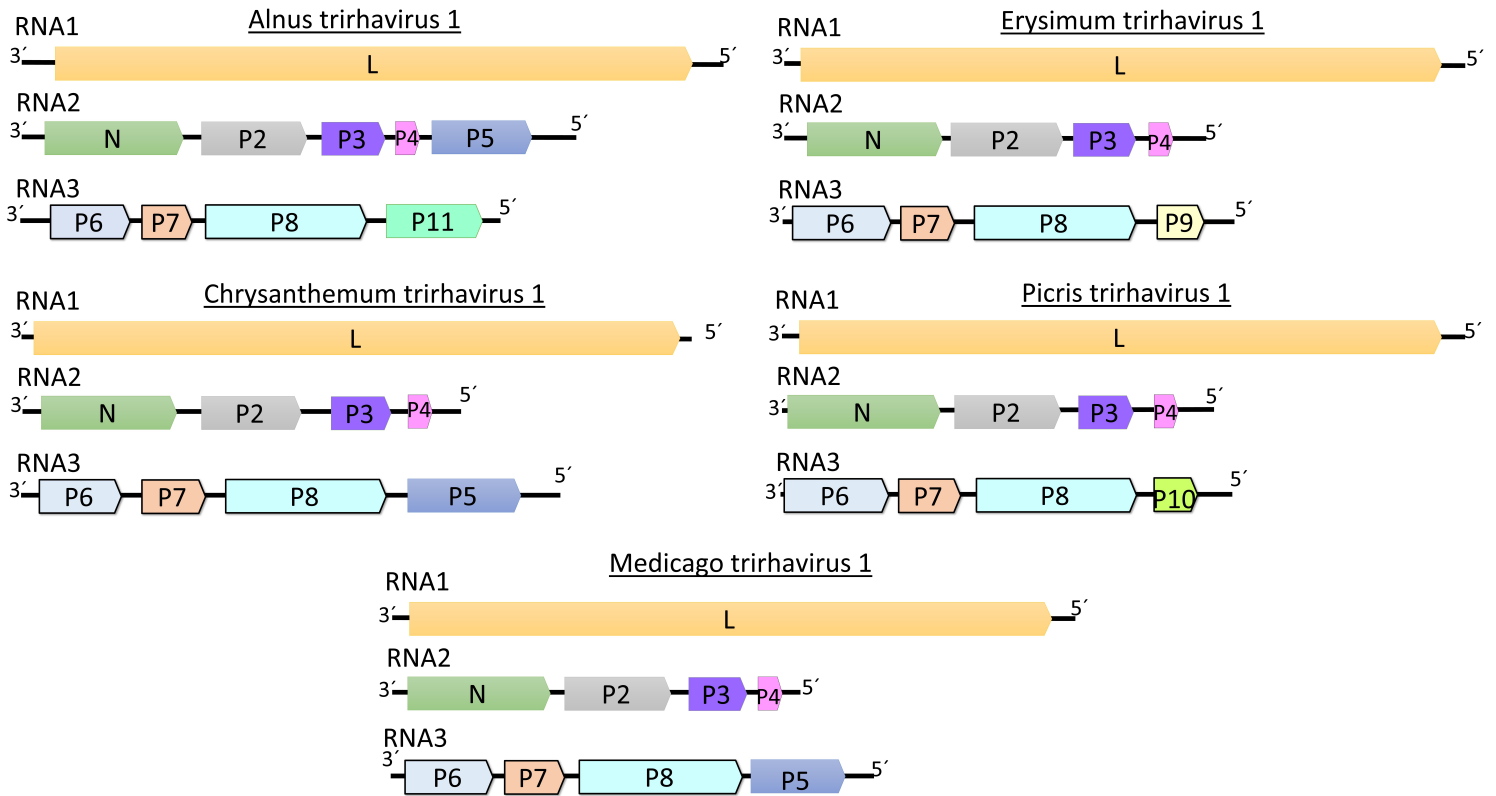

**B**

Consensus

Sequence Logo

Identity

1. *Alnus trirhavirus 1* RNA1
2. *Alnus trirhavirus 1* RNA2
3. *Alnus trirhavirus 1* RNA3

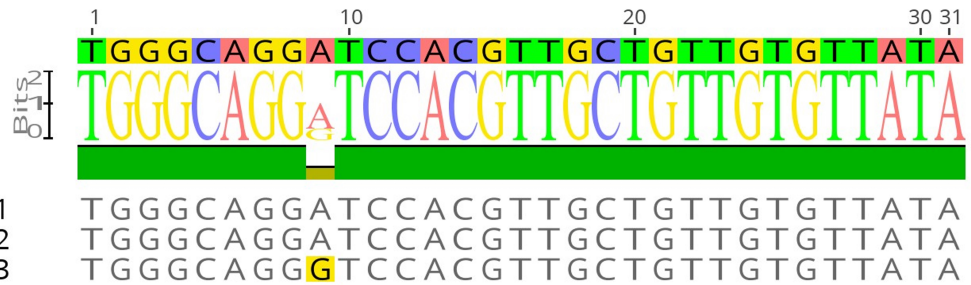

Consensus

Sequence Logo

Identity

1. *Erysimum trirhavirus 1* RNA1
2. *Erysimum trirhavirus 1* RNA2
3. *Erysimum trirhavirus 1* RNA3

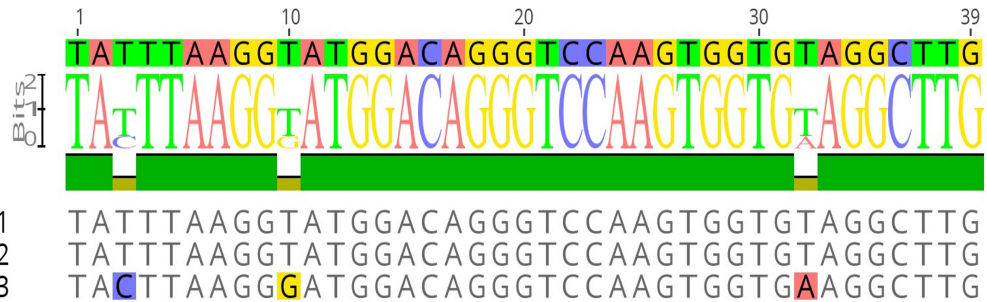

Consensus

Sequence Logo

Identity

1. *Picris trirhavirus 1* RNA1
2. *Picris trirhavirus 1* RNA2
3. *Picris trirhavirus 1* RNA3

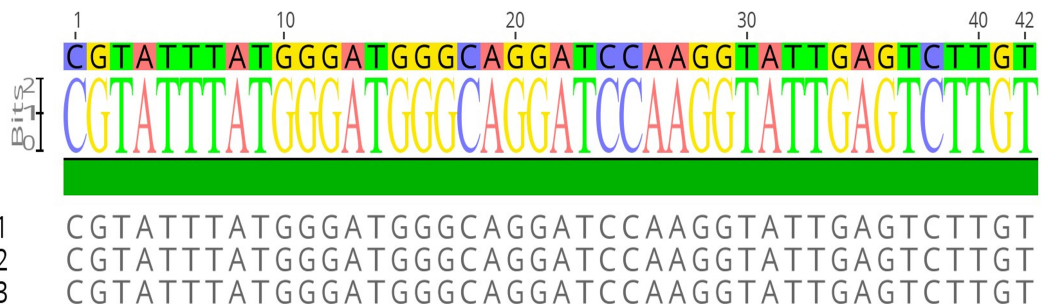

Supplement: s1 [file s1]
