# Supplementary figures and images for: Novel Tri-Segmented Rhabdoviruses: A Data Mining Expedition Unveils the Cryptic Diversity of Cytorhabdoviruses
Source: MDPI journal article supplement (doi:10.3390/v15122402), 2023-12-10

A

B

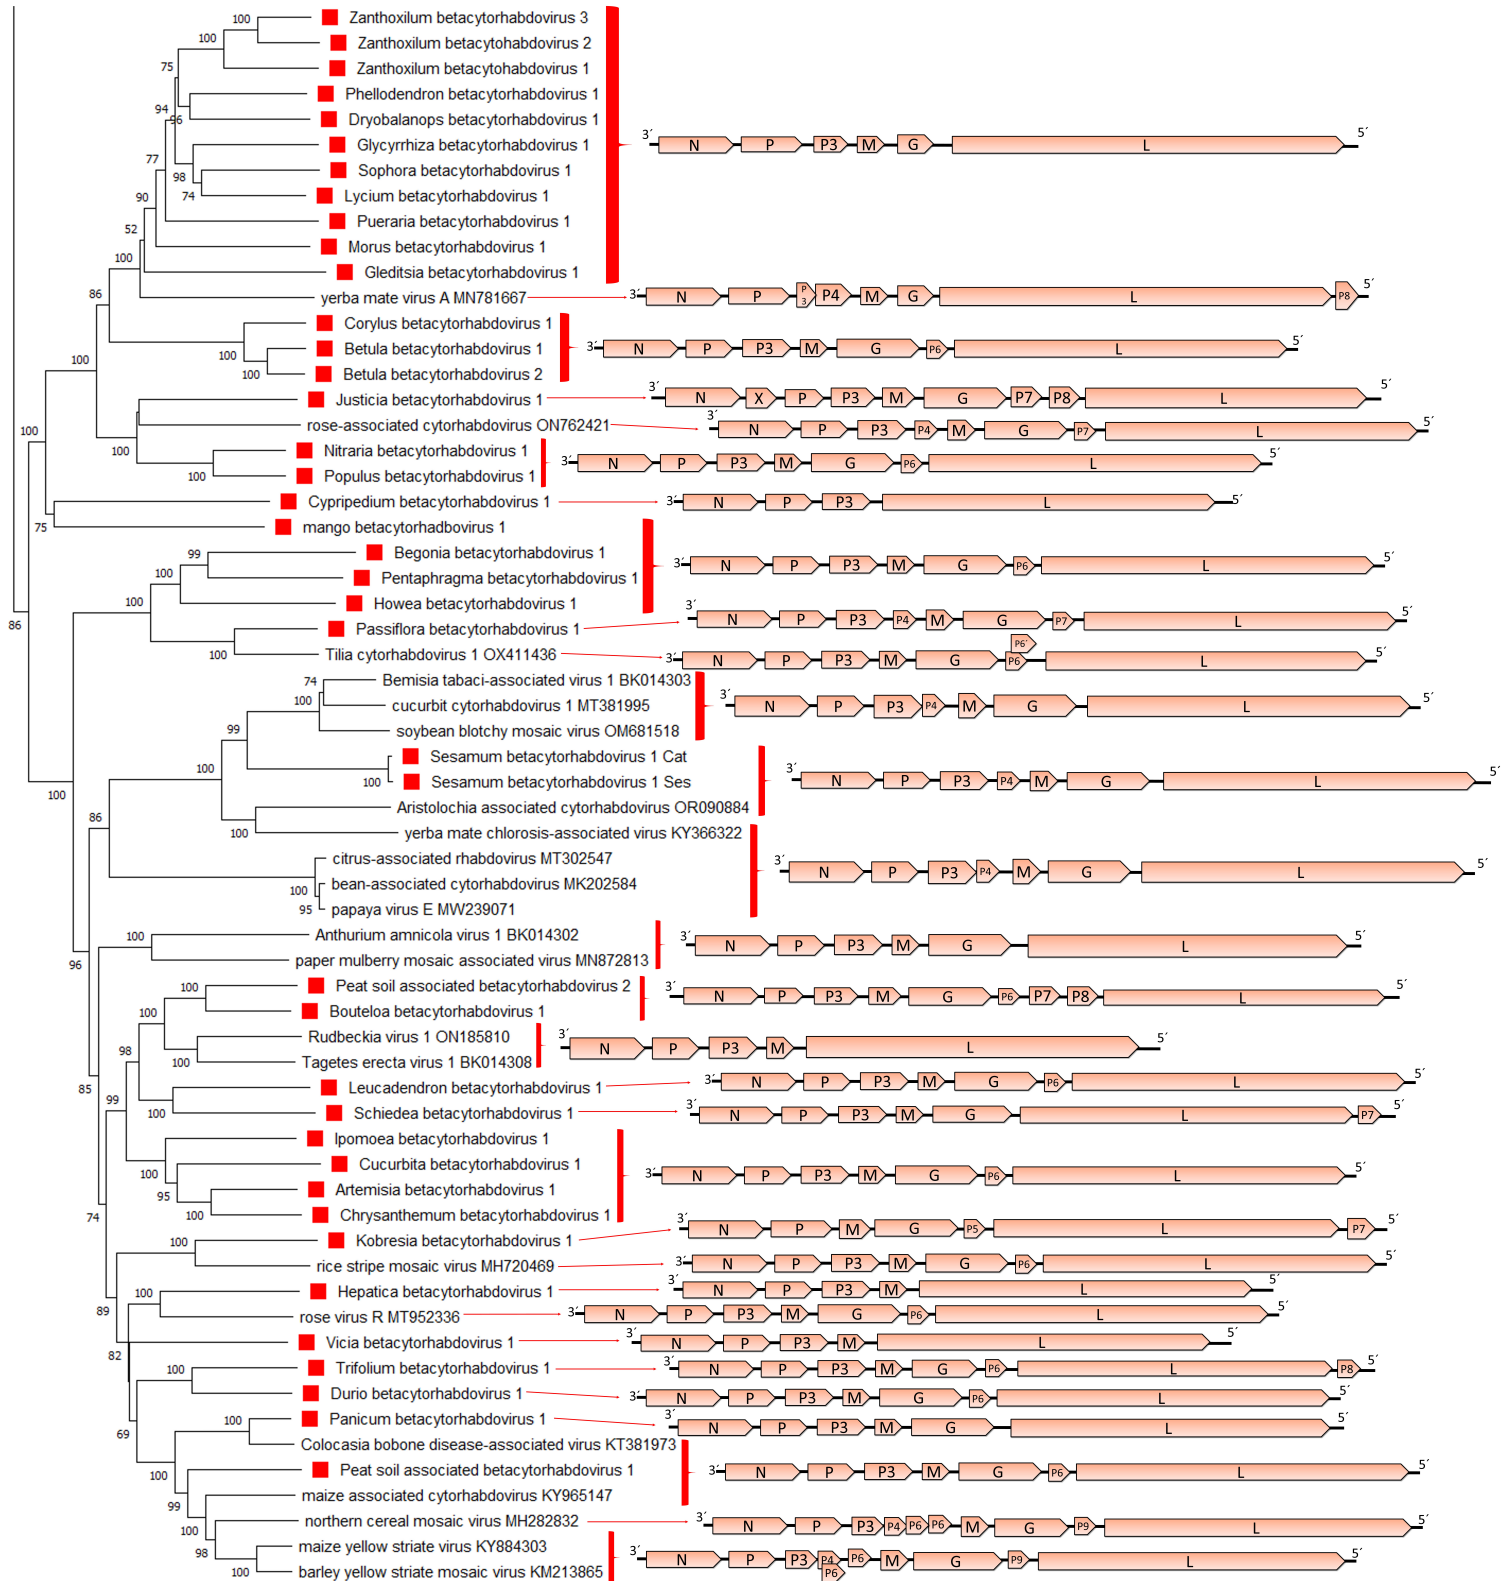

Supplement: s1 [file s1]

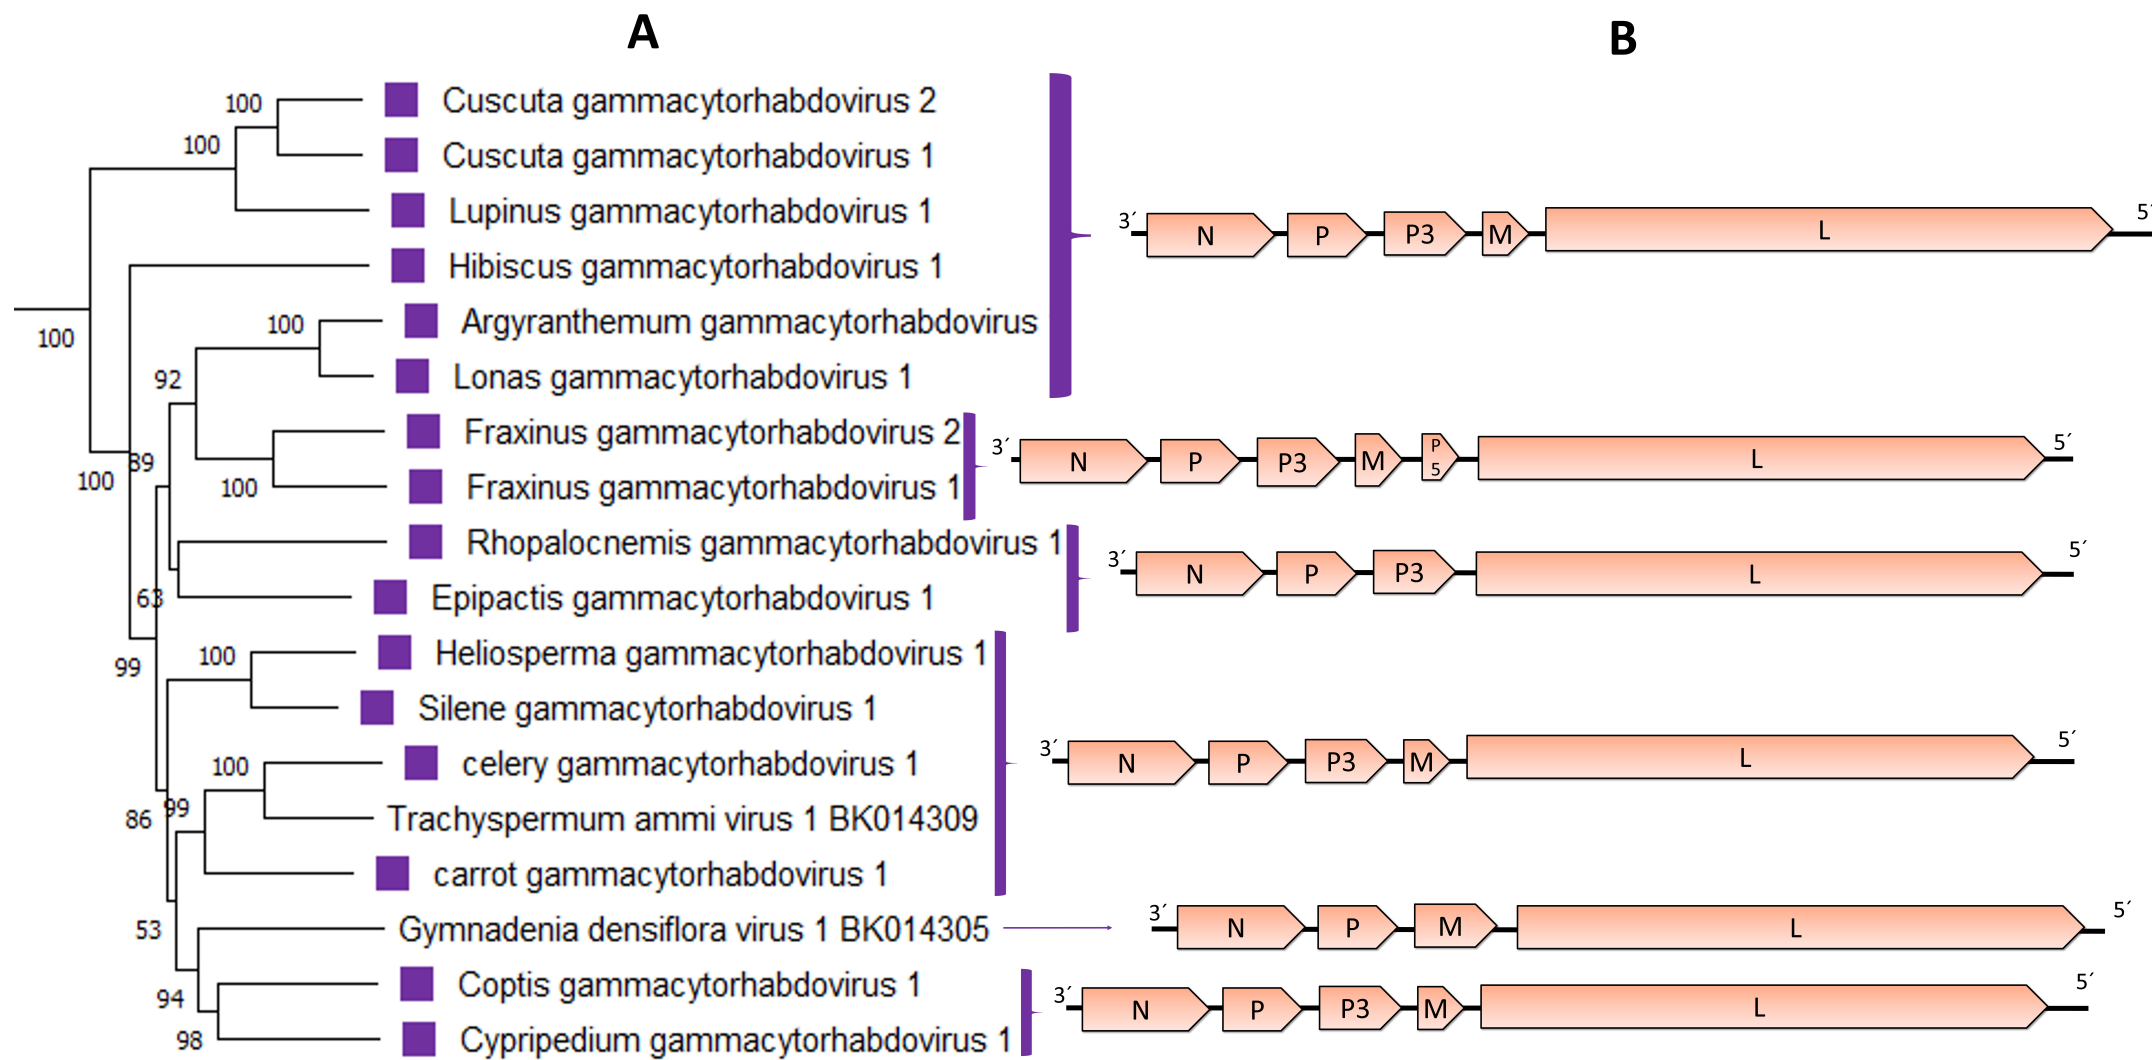

Supplement: s1 [file s1]

**A****B**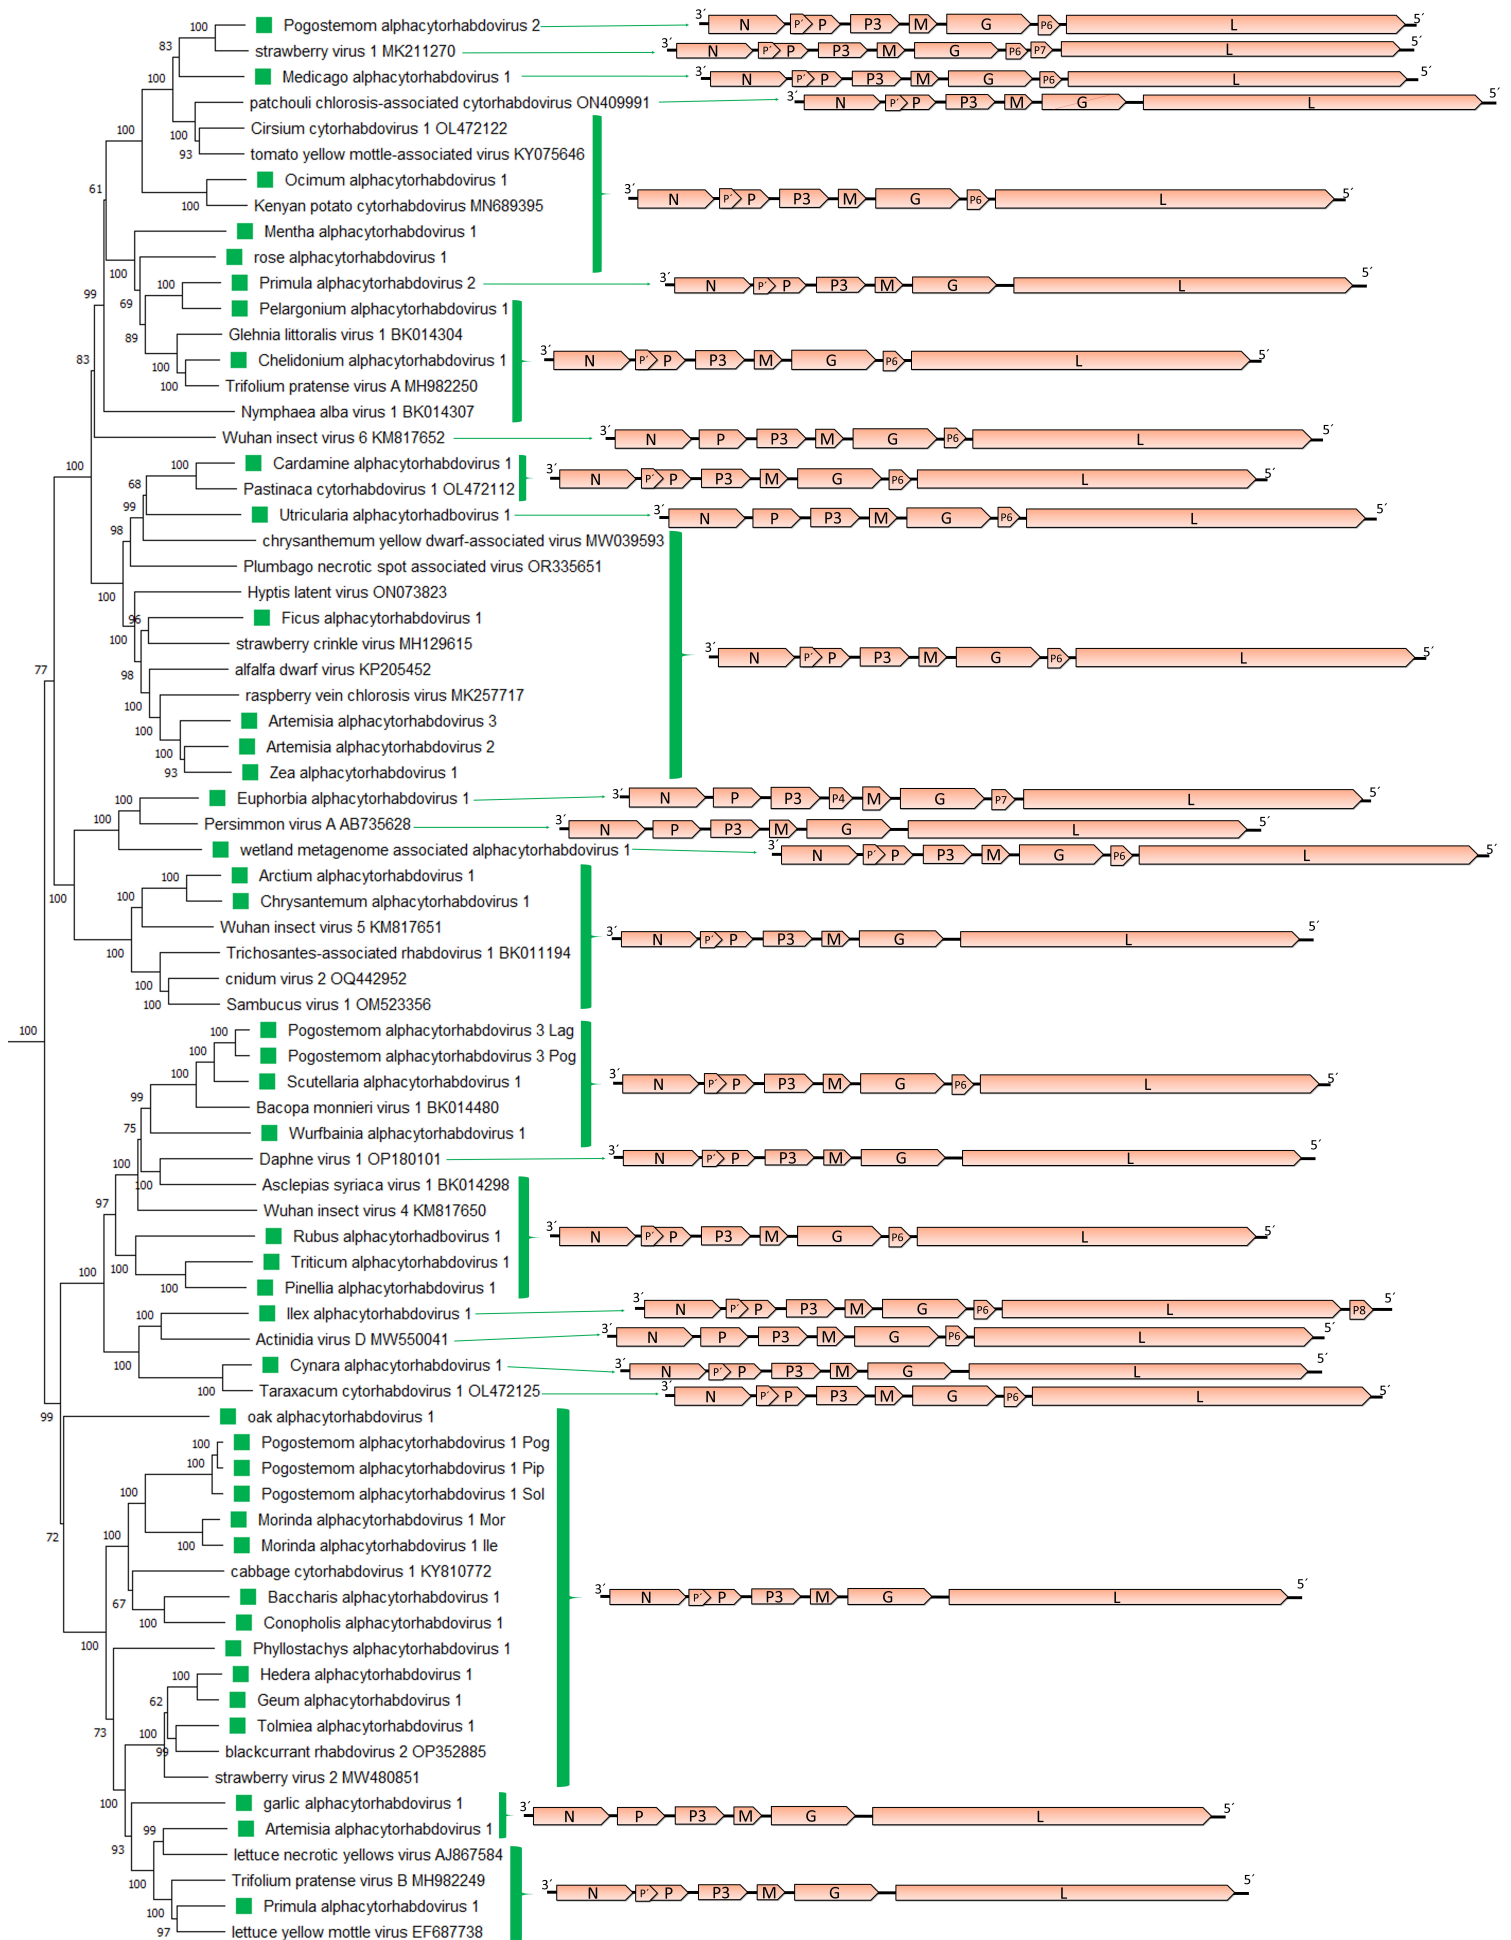

Supplement: s1 [file s1]
